# Supplementary material for: One-pot synthesis of carbazoles by palladium-catalyzed N-arylation and oxidative coupling
Source: Royal Society of Chemistry journal article supplement (doi:10.1039/b707899d), 2007-01-01
Supplement: b707899d.pdf [file b707899d.pdf]

## *Electronic Supporting Information*

### One-pot Synthesis of Carbazoles by Palladium-catalyzed *N*-Arylation and Oxidative Coupling

Toshiaki Watanabe, Satoshi Ueda, Shinsuke Inuki, Shinya Oishi, Nobutaka Fujii,\*  
and Hiroaki Ohno\*

*Graduate School of Pharmaceutical Sciences, Kyoto University  
Sakyo-ku, Kyoto 606-8501 (Japan)*

*E-mail: hohno@pharm.kyoto-u.ac.jp; nfujii@pharm.kyoto-u.ac.jp*

**Table 1:** Investigation of the reaction conditions in oxidative coupling.

| Entry | cat. (mol %) | Oxidant<br>(equiv) | <i>T</i> (°C) | Time<br>(h) | Yield (%) <sup>a</sup> |           |
|-------|--------------|--------------------|---------------|-------------|------------------------|-----------|
|       |              |                    |               |             | <b>5a</b>              | <b>4a</b> |
| 1     | 100          | —                  | 80            | 3           | 78                     | 6         |
| 2     | 20           | O <sub>2</sub>     | 80            | 11          | 85                     | —         |
| 3     | 5            | O <sub>2</sub>     | 80            | 24          | 85                     | trace     |

<sup>a</sup> HPLC yield (absolute calibration curve method).<sup>7</sup>

After the completion of the reaction, the oxide of the phosphine ligand **3** was observed. Dicyclohexyl(2',4',6'-triisopropylbiphenyl-2-yl)phosphine oxide: <sup>31</sup>P NMR (202 MHz, CDCl<sub>3</sub>)  $\delta$  46.8 (the chart shown in p S39). <sup>31</sup>P NMR for the ligand **3**: –11.5 (see: X. Huang, K. W. Anderson, D. Zim, L. Jiang, A. Klapars, S. L. Buchwald, *J. Am. Chem. Soc.*, 2003, **125**, 6653).

## Experimental Section

**Typical Procedure for the One-Pot Reaction by Palladium-catalyzed *N*-Arylation and Oxidative Coupling (Table 3, entry 6):** Toluene (0.4 mL) was added to a flask containing 4-methylphenyl triflate **1b** (48.0 mg, 0.20 mmol), 4-methoxycarbonyl aniline **2d** (33.3 mg, 1.1 equiv), Pd(OAc)<sub>2</sub> (10 mol%), ligand **3** (15 mol%) and Cs<sub>2</sub>CO<sub>3</sub> (1.2 equiv) under argon atmosphere. The mixture was stirred at 100 °C for 1.5 h, then stirred at room temperature for 5 min. AcOH (1.6 mL) was added to the mixture and an oxygen balloon was connected to the reaction vessel, then the reaction mixture was stirred at 80 °C for 22.5 h. After cooling, the reaction mixture was diluted with ethyl acetate, washed with saturated NaHCO<sub>3</sub>, dried over MgSO<sub>4</sub>, and concentrated *in vacuo*. The crude material was purified by flash chromatography with hexane/ethyl acetate (15:1) to afford the desired carbazole **10** (37.4 mg, 78 % yield).

**Materials:** <sup>1</sup>H NMR and <sup>13</sup>C NMR spectral data of diphenylamine **4a**<sup>1</sup> and carbazoles **5a**<sup>2</sup>, **5b**<sup>3</sup>, **5c**<sup>3</sup>, **5d**<sup>4</sup>, **5f**<sup>5</sup>, **5g**<sup>3</sup>, **6**<sup>6</sup>, **7**<sup>7</sup> were in agreement with those previously reported.

<sup>1</sup> Commercially available – CAS# 122-39-4

<sup>2</sup> Commercially available – CAS# 86-74-8

<sup>3</sup> Yamamoto, M.; Matsubara, S. *Chem lett.* 2007, **36**, 172.

<sup>4</sup> Li, W.-S.; McChesney, J. D.; El-Feraly, F. S. *Phytochemistry* 1991, **30**, 133.

<sup>5</sup> Campeau, L.-C.; Thansandote, P.; Fagnou, K. *Org. Lett.* 2005, **7**, 1857.

<sup>6</sup> Forbes, E. J.; Stacey, M.; Tatlow, J. C.; Wragg, R. T. *Tetrahedron* 1960, **8**, 67.

<sup>7</sup> Witulski, B.; Alayrac, C. *Angew. Chem., Int. Ed.* 2002, **41**, 3281.

### Characterization Data for Carbazoles (New Compounds)

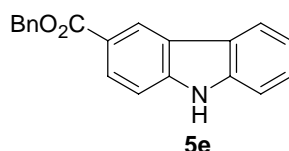

**Benzyl 9H-Carbazole-3-carboxylate (5e):** White solid; IR cm<sup>-1</sup>: 3289 (NH), 1693 (CO); <sup>1</sup>H NMR (400 MHz, CDCl<sub>3</sub>) δ 5.43 (s, 2H, CH<sub>2</sub>), 7.27 (m, 1H, Ar), 7.35-7.44 (m, 6H, Ar), 7.51 (d, *J* = 7.1 Hz, 2H, Ar), 8.10 (d, *J* = 7.8 Hz, 1H, Ar), 8.16 (dd, *J* = 7.8, 1.5 Hz, 1H, Ar), 8.35 (s, 1H, NH), 8.84 (s, 1H, Ar); <sup>13</sup>C NMR (100 MHz, CDCl<sub>3</sub>) δ 66.5, 110.1, 110.9, 120.3, 120.7, 121.3, 123.0, 123.1, 123.3, 126.6, 127.6, 128.1, 128.2 (2C), 128.6 (2C), 136.5, 139.9, 142.4, 167.2; m.p. = 154-155°C; HRMS (EI): *m/z* calcd for C<sub>20</sub>H<sub>15</sub>NO<sub>2</sub> (M<sup>+</sup>) 301.1103; found: 301.1100.

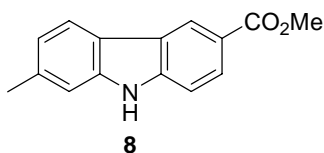

**Methyl 7-methyl-9H-carbazole-3-carboxylate (8):** Yellow white solid; IR  $\text{cm}^{-1}$ : 3336 (NH), 2949 (CH), 1697 (CO);  $^1\text{H}$  NMR (400 MHz,  $\text{CDCl}_3$ ):  $\delta$  2.52 (s, 3H,  $\text{CH}_3$ ), 3.97 (s, 3H,  $\text{CO}_2\text{Me}$ ), 7.12 (d,  $J = 8.0$  Hz, 1H, Ar), 7.22 (s, 1H, Ar), 7.37 (d,  $J = 8.5$  Hz, 1H, Ar), 7.98 (d,  $J = 8.0$  Hz, 1H, Ar), 8.10 (dd,  $J = 8.5, 1.5$  Hz, 1H, Ar), 8.24 (s, 1H, NH), 8.76 (s, 1H, Ar);  $^{13}\text{C}$  NMR (100 MHz,  $\text{CDCl}_3$ ):  $\delta$  22.0, 51.9, 110.0, 111.0, 120.3, 121.0, 121.3, 121.9, 122.5, 123.2, 127.0, 136.9, 140.4, 142.3, 168.0; m.p. = 210-212°C; HRMS (EI):  $m/z$  calcd for  $\text{C}_{15}\text{H}_{13}\text{NO}_2$  ( $\text{M}^+$ ) 239.0946; found: 239.0942.

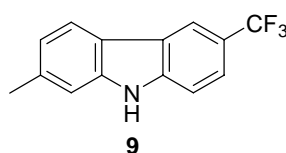

**3-Trifluoromethyl-7-methyl-9H-carbazole (9):** Brown solid; IR  $\text{cm}^{-1}$ : 3392 (NH), 2928 (CH);  $^1\text{H}$  NMR (400 MHz,  $\text{CDCl}_3$ ):  $\delta$  2.52 (s, 3H,  $\text{CH}_3$ ), 7.10 (d,  $J = 8.0$  Hz, 1H, Ar), 7.20 (s, 1H, Ar), 7.39 (d,  $J = 8.5$  Hz, 1H, Ar), 7.60 (d,  $J = 8.5$  Hz, 1H, Ar), 7.94 (d,  $J = 8.0$  Hz, 1H, Ar), 8.03 (s, 1H, NH), 8.27 (s, 1H, Ar);  $^{13}\text{C}$  NMR (100 MHz,  $\text{CDCl}_3$ ):  $\delta$  22.0, 110.5, 111.0, 117.5 (q), 120.2, 120.5, 121.9, 122.0 (q), 122.1, (d) 123.1, 125.3 (q), 137.2, 140.4, 140.9; m.p. = 202-203°C; HRMS (FAB):  $m/z$  calcd for  $\text{C}_{14}\text{H}_{10}\text{F}_3\text{N}$  ( $\text{M}^+$ ) 249.0765; found: 249.0768.

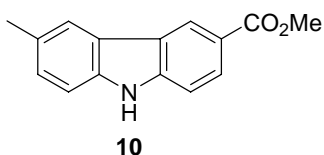

**Methyl 6-methyl-9H-carbazole-3-carboxylate (10):** Yellow white solid; IR  $\text{cm}^{-1}$ : 3295 (NH), 2948-2851 (CH), 1684 (CO);  $^1\text{H}$  NMR (400 MHz,  $\text{DMSO}-d_6$ ):  $\delta$  2.49 (s, 3H,  $\text{CH}_3$ ), 3.90 (s, 3H,  $\text{CO}_2\text{Me}$ ), 7.29 (d,  $J = 8.3$  Hz, 1H, Ar), 7.44 (d,  $J = 8.3$  Hz, 1H, Ar), 7.53 (d,  $J = 8.5$  Hz, 1H, Ar), 7.99 (d,  $J = 8.5$  Hz, 1H, Ar), 8.75 (s, 1H, Ar), 8.75 (s, 1H, Ar), 11.58 (s, 1H, NH);  $^{13}\text{C}$  NMR (100 MHz,  $\text{DMSO}-d_6$ ):  $\delta$  21.0, 51.7, 110.7, 111.1, 119.5, 120.3, 122.0, 122.2, 122.5, 126.4, 127.7, 128.3, 138.5, 142.7, 166.9; m.p. = 233-235°C; HRMS (FAB):  $m/z$  calcd for  $\text{C}_{15}\text{H}_{13}\text{NO}_2$  ( $\text{M}^+$ ) 239.0946; found: 239.0945.

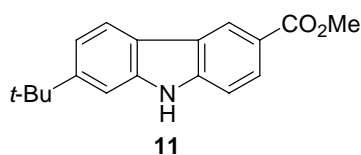

**Methyl 7-tert-butyl-9H-carbazole-3-carboxylate (11):** White solid; IR  $\text{cm}^{-1}$ : 3282 (NH), 2968 ( $\text{CH}_3$ ), 1695 (CO);  $^1\text{H}$  NMR (400 MHz,  $\text{CDCl}_3$ ):  $\delta$  1.43 (s, 9H,  $t\text{-Bu}$ ), 3.97 (s, 3H,  $\text{CO}_2\text{Me}$ ), 7.37 (dd,  $J = 8.3, 1.7$  Hz, 1H, Ar), 7.41 (d,  $J = 8.5$  Hz, 1H, Ar), 7.46 (d,  $J = 1.7$  Hz, 1H, Ar), 8.03 (d,  $J = 8.3$

Hz, 1H, Ar), 8.10 (dd,  $J = 8.5, 1.7$  Hz, 1H, Ar), 8.19 (s, 1H, NH), 8.77 (s, 1H, Ar);  $^{13}\text{C}$  NMR (100 MHz,  $\text{CDCl}_3$ ):  $\delta$  31.7 (3C), 35.2, 51.9, 107.4, 110.0, 118.5, 120.1, 121.0, 121.3, 122.7, 123.2, 127.0, 140.2, 142.5, 150.5, 168.0; m.p. = 224-228°C; HRMS (FAB):  $m/z$  calcd for  $\text{C}_{18}\text{H}_{19}\text{NO}_2$  ( $\text{M}^+$ ) 281.1416; found: 281.1414.

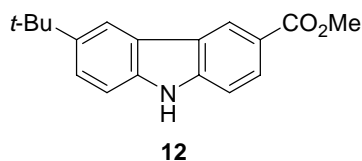

**Methyl 6-tert-Butyl-9H-carbazole-3-carboxylate (12):** White solid; IR  $\text{cm}^{-1}$ : 3331 (NH), 2955 (CH), 1694 (CO);  $^1\text{H}$  NMR (400 MHz,  $\text{CDCl}_3$ ):  $\delta$  1.45 (s, 9H,  $t\text{-Bu}$ ), 3.98 (s, 3H,  $\text{CO}_2\text{Me}$ ), 7.39 (d,  $J = 8.5$  Hz, 1H, Ar), 7.40 (d,  $J = 8.5$  Hz, 1H, Ar), 7.54 (dd,  $J = 8.5, 2.0$  Hz, 1H, Ar), 8.11 (dd,  $J = 8.5, 1.7$  Hz, 1H, Ar), 8.14 (s, 1H, Ar), 8.22 (s, 1H, NH), 8.83 (s, 1H, Ar);  $^{13}\text{C}$  NMR (100 MHz,  $\text{CDCl}_3$ ):  $\delta$  31.9 (3C), 34.8, 51.9, 110.1, 110.4, 116.8, 121.2, 122.7, 123.1, 123.4, 124.6, 127.2, 138.0, 142.7, 143.5, 167.9; m.p. = 216-217°C; HRMS (FAB):  $m/z$  calcd for  $\text{C}_{18}\text{H}_{19}\text{NO}_2$  ( $\text{M}^+$ ) 281.1416; found: 281.1414.

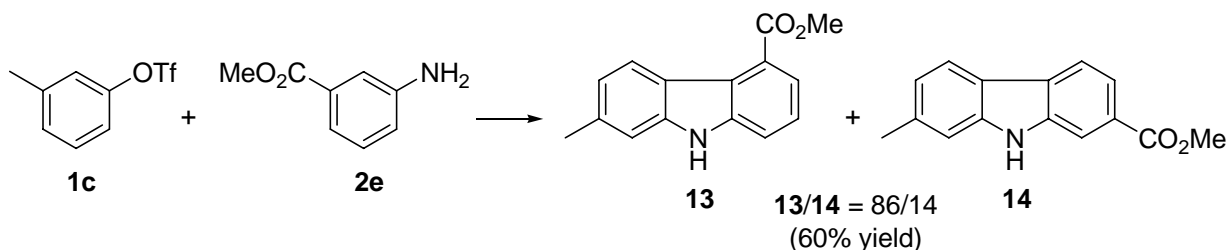

**Methyl 7-Methyl-9H-carbazole-4-carboxylate (13) and Methyl 7-Methyl-9H-carbazole-2-carboxylate (14).** By a procedure identical with that described for the synthesis of **10**, triflate **1c** (48.0 mg, 0.20 mmol) and aniline **2e** (33.3 mg, 1.1 equiv) were converted into a regioisomeric mixture of **13** and **14** (28.5 mg, 60% yield; **13/14** = 86:14), which was separated by HPLC.

Compound **13**: white solid; IR  $\text{cm}^{-1}$ : 3402 (NH), 2950-2860 (CH), 1702 (CO);  $^1\text{H}$  NMR (400 MHz,  $\text{CDCl}_3$ ):  $\delta$  2.49 (s, 3H,  $\text{CH}_3$ ), 4.05 (s, 3H,  $\text{CO}_2\text{Me}$ ), 7.07 (d,  $J = 8.3$  Hz, 1H, Ar), 7.12 (s, 1H, Ar), 7.36 (dd,  $J = 8.1, 7.6$  Hz, 1H, Ar), 7.49 (d,  $J = 8.1$  Hz, 1H, Ar), 7.84 Hz (d,  $J = 7.6$  Hz, 1H, Ar), 8.12 (s, 1H, NH), 8.71 (d,  $J = 8.3$  Hz, 1H, Ar);  $^{13}\text{C}$  NMR (100 Hz,  $\text{CDCl}_3$ ):  $\delta$  21.9, 52.1, 110.4, 114.8, 119.6, 121.4, 122.0, 122.6, 124.1, 124.7, 125.2, 137.2, 140.3, 140.8, 168.6; m.p. = 220-221°C; HRMS (FAB):  $m/z$  calcd for  $\text{C}_{15}\text{H}_{13}\text{NO}_2$  ( $\text{M}^+$ ) 239.0946; found: 239.0942.

Compound **14**: white solid; IR:  $\nu = 3402$  (NH), 2952 (CH), 1713 (CO);  $^1\text{H}$  NMR (400 MHz,  $\text{CDCl}_3$ ):  $\delta$  2.54 (s, 3H,  $\text{CH}_3$ ), 3.97 (s, 3H,  $\text{CO}_2\text{Me}$ ), 7.10 (d,  $J = 8.1$  Hz, 1H, Ar), 7.26 (s, 1H, Ar), 7.92 (d,  $J = 8.1$  Hz, 1H, Ar), 7.98 (d,  $J = 8.1$  Hz, 1H, Ar), 8.05 Hz (d,  $J = 8.1$  Hz, 1H, Ar), 8.12 (s, 1H, NH), 8.13 (s, 1H, Ar);  $^{13}\text{C}$  NMR (100 Hz,  $\text{CDCl}_3$ ):  $\delta$  22.2, 52.1, 111.0, 112.3, 119.6, 120.3, 120.7, 120.8, 121.7, 126.8, 127.3, 137.7, 138.8, 141.3, 167.8; m.p. = 215-216°C; HRMS (FAB):  $m/z$  calcd for  $\text{C}_{15}\text{H}_{13}\text{NO}_2$  ( $\text{M}^+$ ) 239.0946; found: 239.0948.

\\Nmr400mhz\seizo\watanabe\Sample\Diphenylamine\_E10\_FT.als  
carbazole

DFILE \\Nmr400mhz\seizo\watanabe\Sa  
COMNT carbazole  
DATIM Fri Apr 07 18:22:25 2006  
OBNUC 1H  
EXMOD NON  
OBFRQ 399.65 MHz  
OBSET 124.00 KHz  
OBFIN 10500.0 Hz  
POINT 32768  
FREQU 7992.0 Hz  
SCANS 8  
ACQTM 4.100 sec  
PD 2.900 sec  
PW1 5.5 us  
IRNUC 1H  
CTEMP 21.9 c  
SLVNT CDCL3  
EXREF 0.00 ppm  
Bf 0.12 Hz  
RGAIN 14

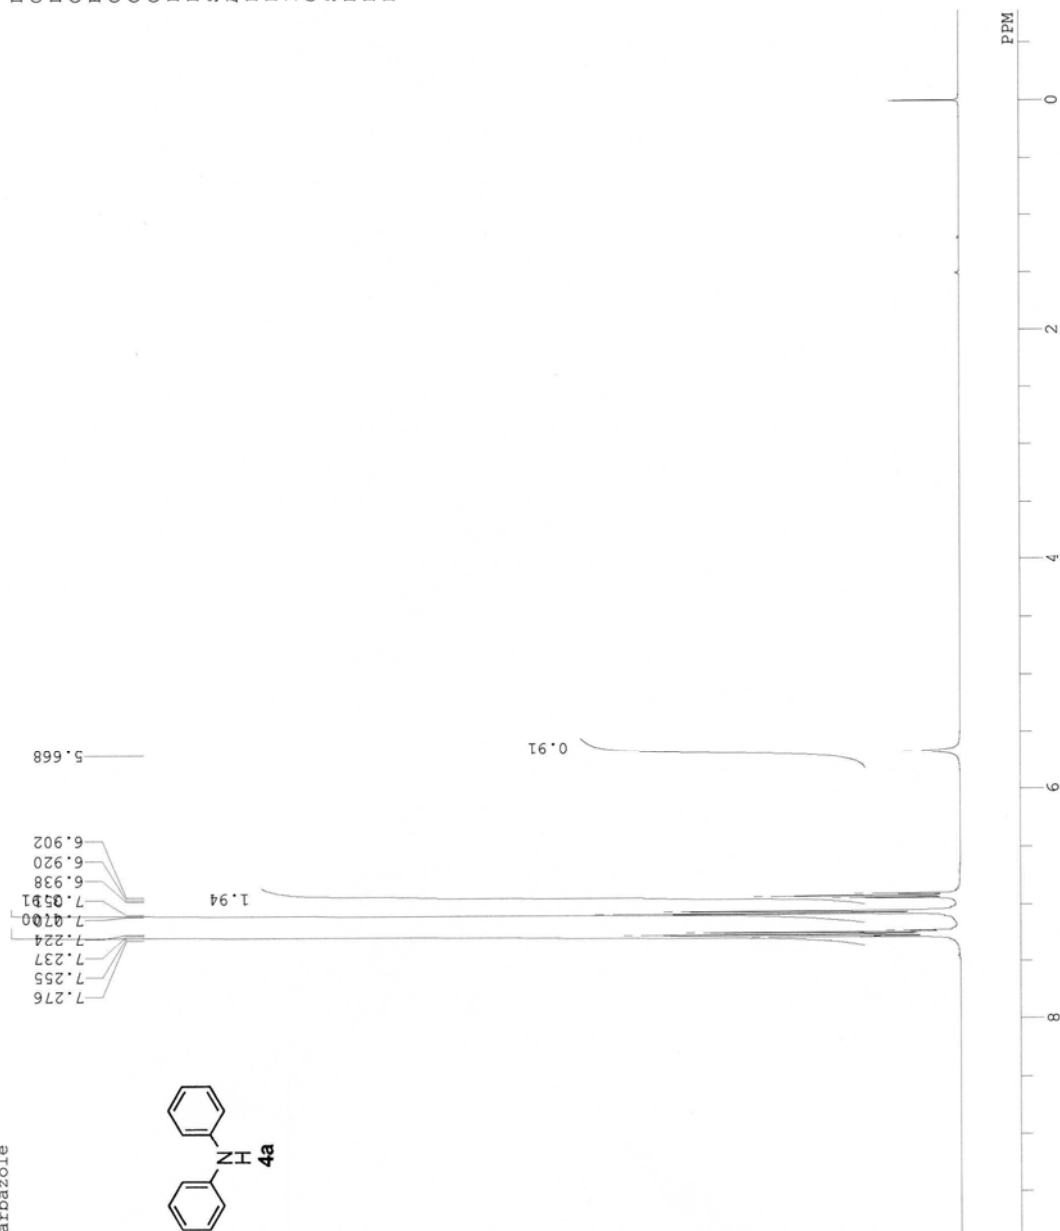

\\Nmr400mhz\seizo\watanabe\Sample\diphenylamine2BCM\_E1\_Ft.als  
diphenylamine

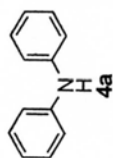

DFILE \\Nmr400mhz\seizo\watanabe  
COMNT diphenylamine  
DATIM Fri Jun 16 23:38:31 2006  
OBNUC 13C  
EXMOD BCM  
OBFRQ 100.40 MHz  
OBSET 125.00 KHz  
OBFIN 10500.0 Hz  
POINT 32768  
FREQU 27118.6 Hz  
SCANS 1024  
ACQTM 1.208 sec  
PD 1.792 sec  
PWL 5.1 us  
IRNUC 1H  
CTEMP 20.8 c  
SLVNT CDCL3  
EXREF 77.00 ppm  
BF 1.20 Hz  
RGAIN 24

143.051  
129.558  
129.286  
128.998  
121.177  
120.930  
120.617  
118.048  
118.015  
117.752  
117.439  
77.321  
77.000  
76.687

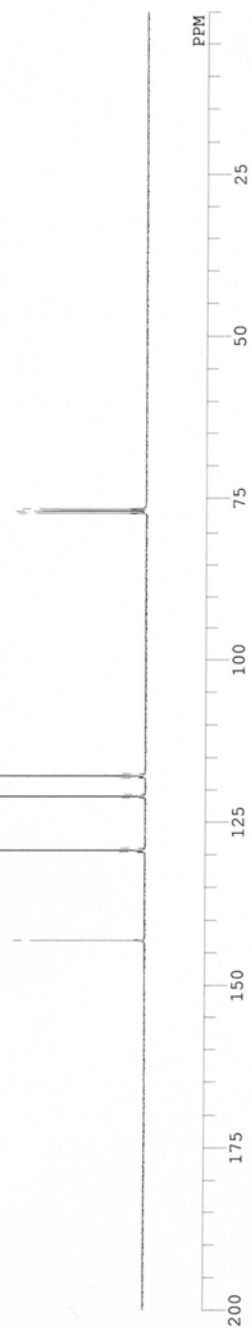

\\Nmr400mhz\seizo\watanabe\Tandem\carb\NON\_E5\_Ft.als  
carb

DFILE \\Nmr400mhz\seizo\wata  
COMNT carb  
DATIM Wed Feb 28 15:41:35 20  
OBNUC 1H  
EXMOD NON  
OBFRQ 399.65 MHz  
OBSET 124.00 KHz  
OBEIN 10500.0 Hz  
POINT 32768  
FREQU 7992.0 Hz  
SCANS 8  
AQTM 4.100 sec  
PD 2.900 sec  
PWL 5.5 us  
IRNUC 1H  
CTEMP 15.6 C  
SLVNT CDCL3  
EXREF 0.00 ppm  
BF 0.12 Hz  
RGAIN 18

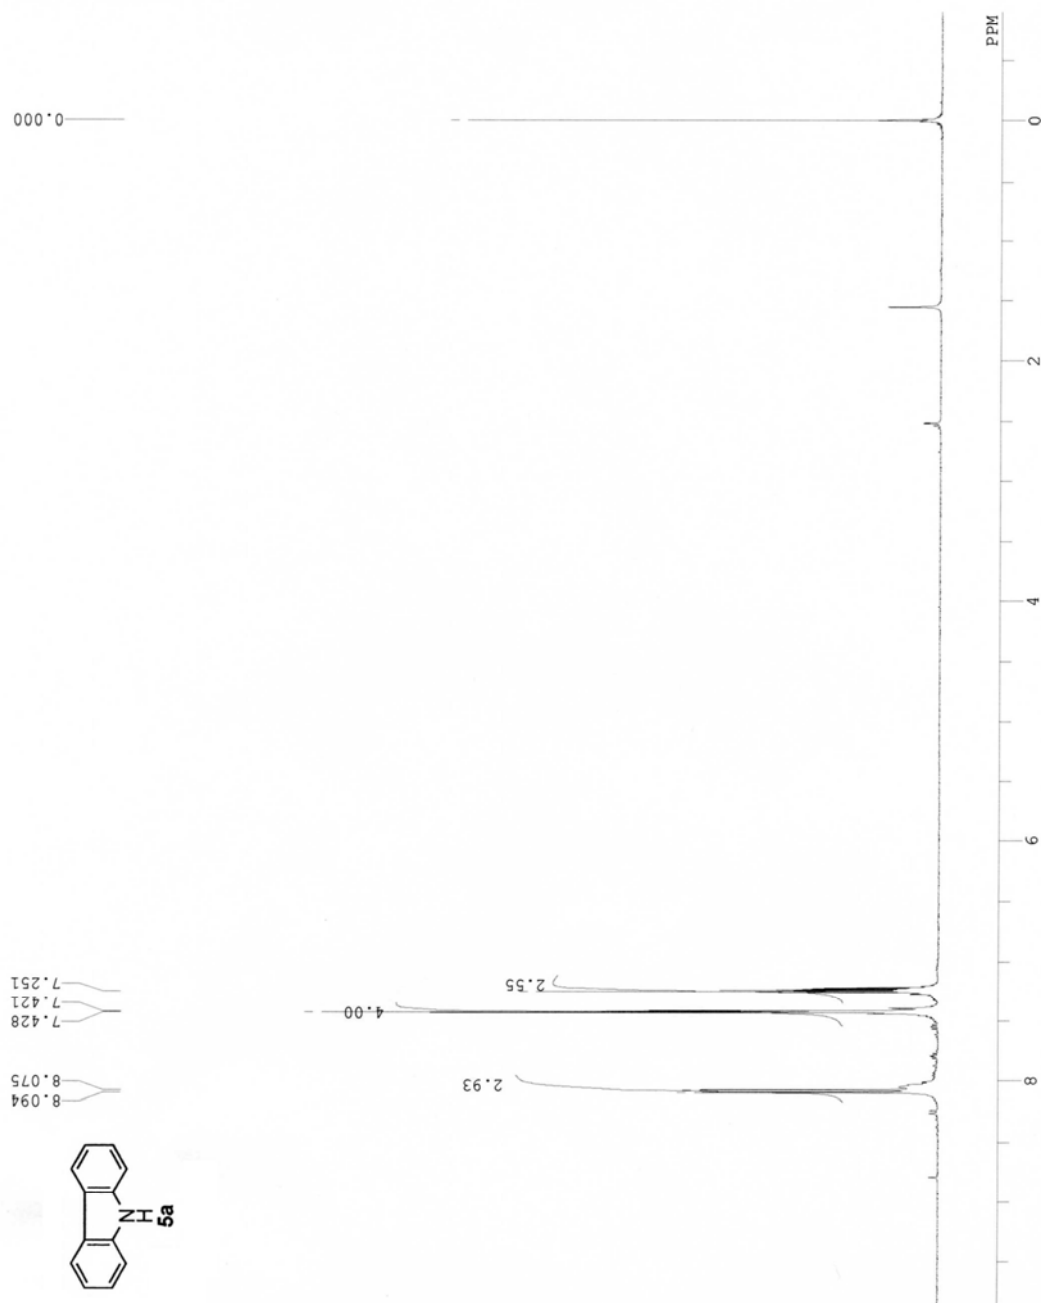

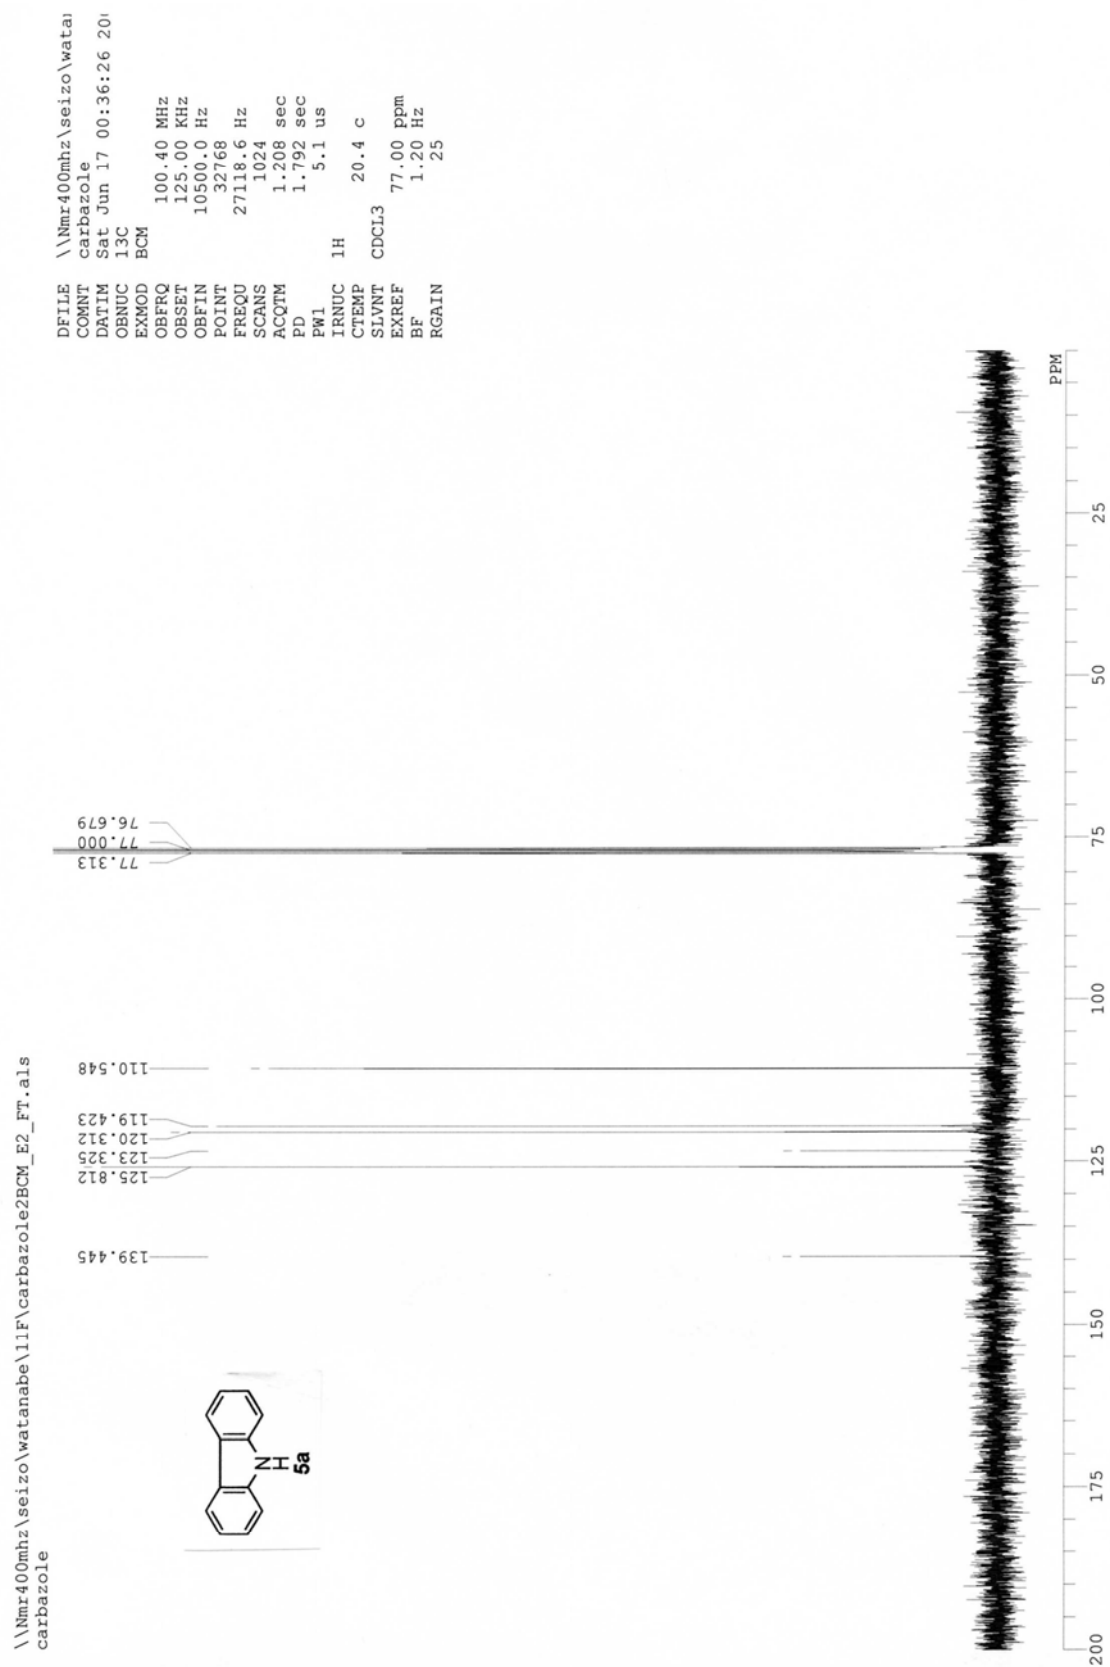



|        |                         |
|--------|-------------------------|
| DFILE  | \\Nmr400mhz\seizo\data\ |
| COMINT | FIL-269 b fr2           |
| DATEIN | Sun Jun 25 11:52:34 201 |
| OBNUC  | 1H                      |
| EXMOD  | NON                     |
| OBFRQ  | 399.65 MHz              |
| OBSET  | 124.00 KHz              |
| OBFIN  | 10500.0 Hz              |
| POINT  | 32768                   |
| FREQU  | 7992.0 Hz               |
| SCANS  | 32                      |
| ACQTM  | 4.100 sec               |
| PD     | 2.900 sec               |
| PW1    | 5.5 us                  |
| IRNUC  | 1H                      |
| CTEMP  | 19.5 c                  |
| SLVNT  | CDCl3                   |
| EXREF  | 0.00 ppm                |
| BF     | 0.12 Hz                 |
| RGAIN  | 21                      |

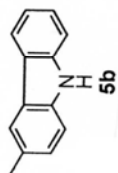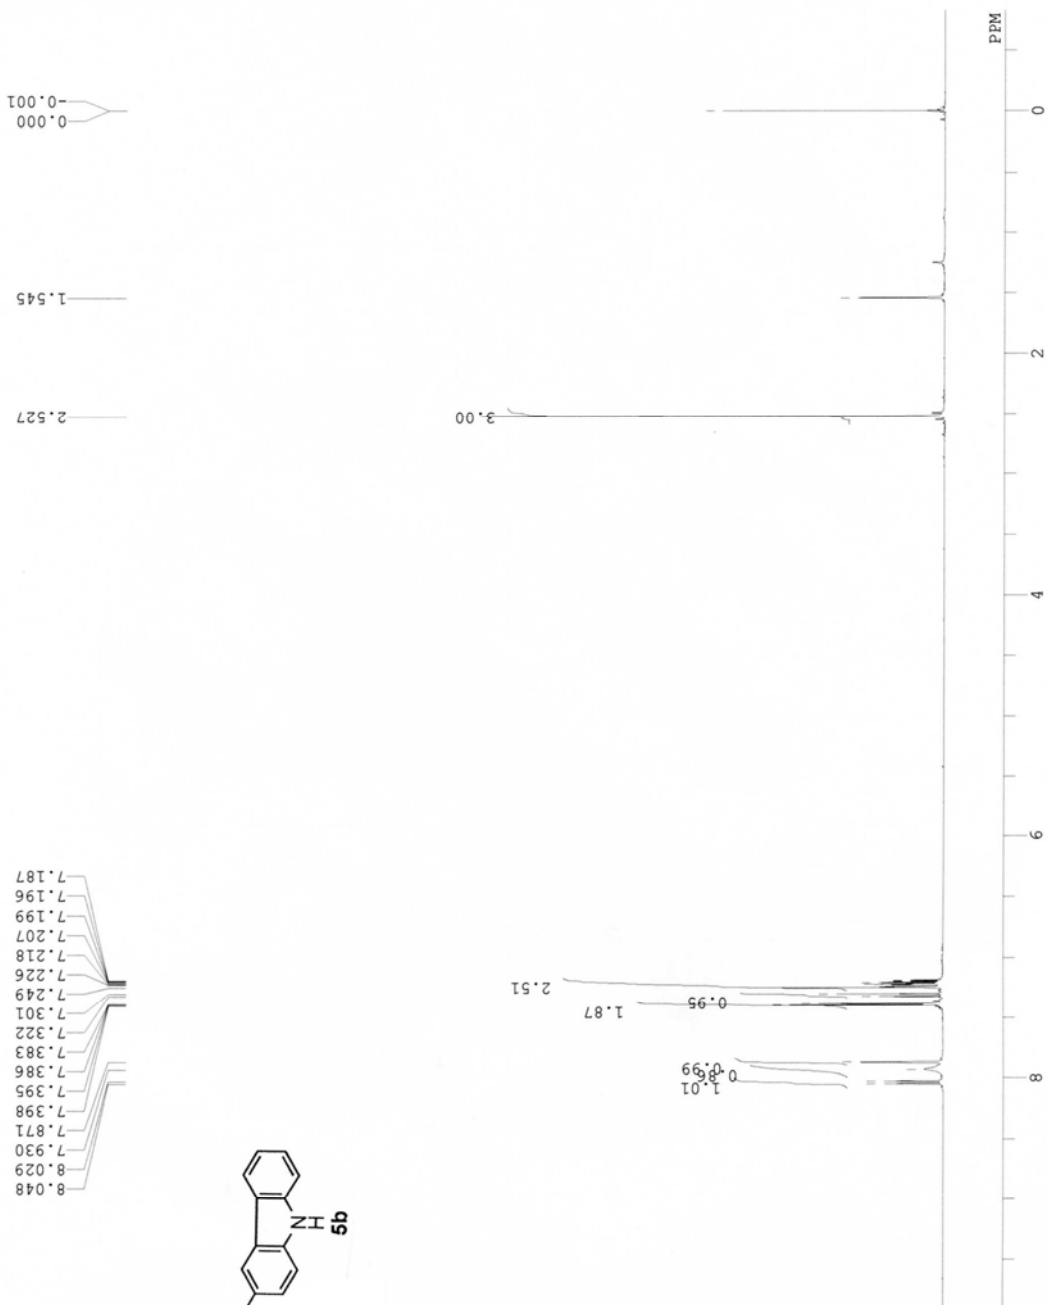

C:\Documents and Settings\seizou\ffXfNfgfbv\F11-269 b fr22BCM\_E17\_Ft.als  
F11-269 b fr2

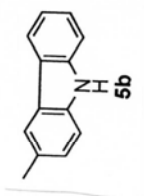

DFILE C:\Documents and Settli  
COMNT F11-269 b fr2  
DATIM Sun Jun 25 13:35:23 20  
OBNUC 13C  
EXMOD BCM  
OBFRO 100.40 MHz  
OBSET 125.00 KHz  
OBFIN 10500.0 Hz  
POINT 32768  
FREQU 27118.6 Hz  
SCANS 2048  
ACQTM 1.208 sec  
PD 1.792 sec  
PWL 5.1 us  
IRNUC 1H  
CTEMP 19.8 c  
SLVNT CDCL3  
EXREF 0.00 ppm  
BF 1.20 Hz  
RGAIN 25

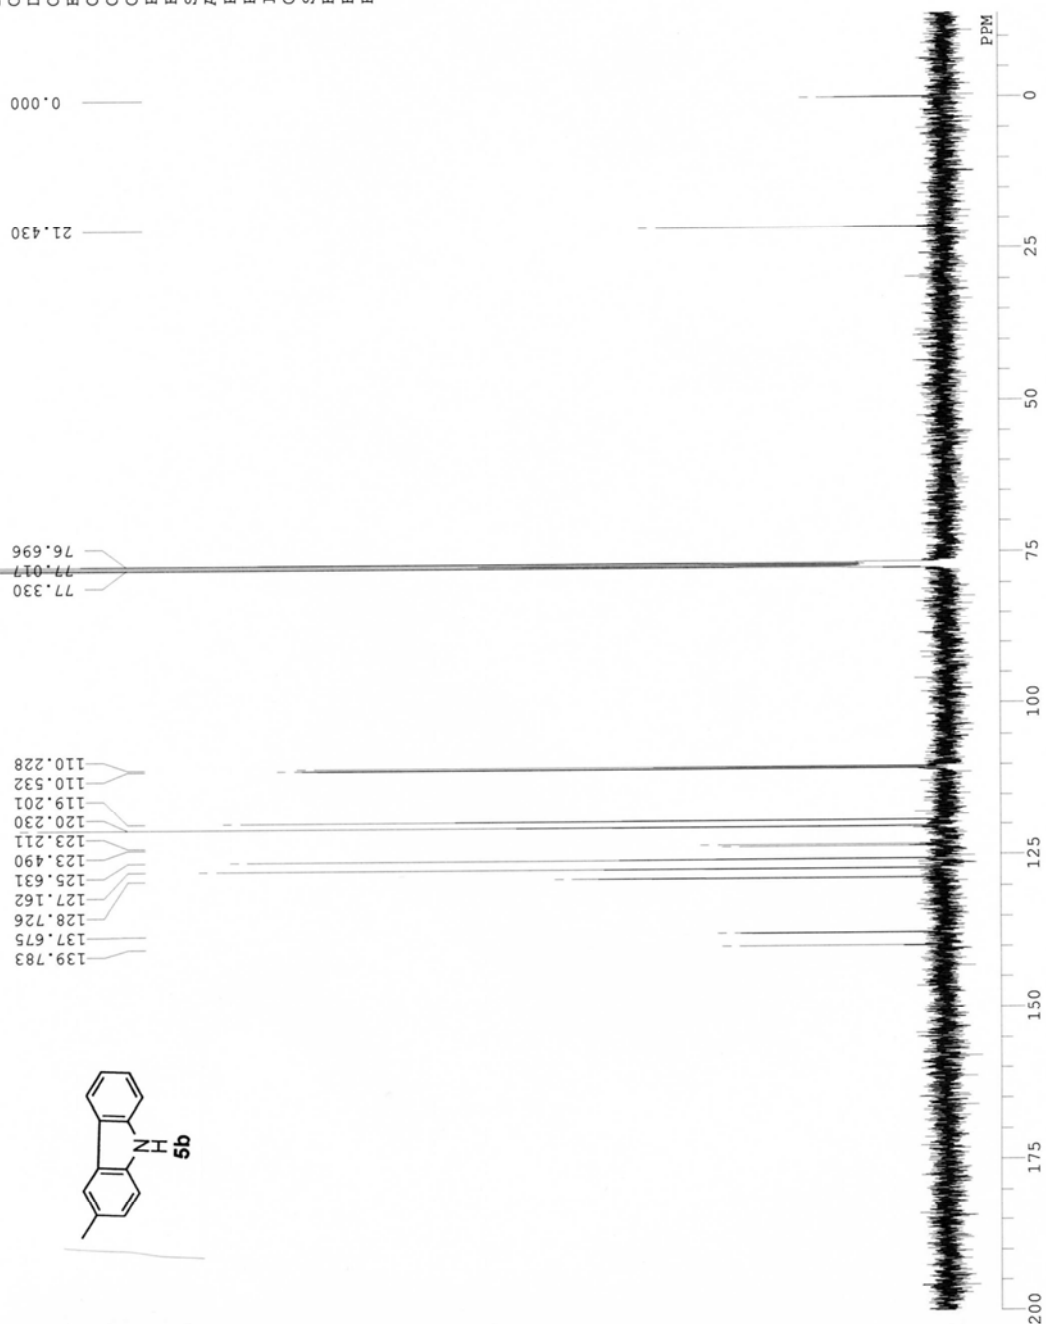

\\Nmr400mhz\seizo\watanabe\Tandem\m-Me carbinON\_E13\_FT.als  
m-Me carb

8.033  
8.014  
7.950  
7.930  
7.884  
7.381  
7.374  
7.368  
7.245  
7.227  
7.207  
7.197  
7.067  
7.047

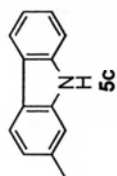

DFILE \\Nmr400mhz\seizo\watan  
COMNT m-Me carb  
DATIM Wed Oct 18 00:45:46 20  
OBNUC 1H  
EXMOD NON  
OBFRQ 399.65 MHz  
OBSET 124.00 KHz  
OBFIN 10500.0 Hz  
POINT 32768  
FREQU 7992.0 Hz  
SCANS 8  
ACQTM 4.100 sec  
PD 2.900 sec  
PWL 5.5 us  
IRNUC 1H  
CTEMP 24.5 c  
SLVNT CDCL3  
EXREF 0.00 ppm  
BF 0.12 Hz  
RGAIN 19

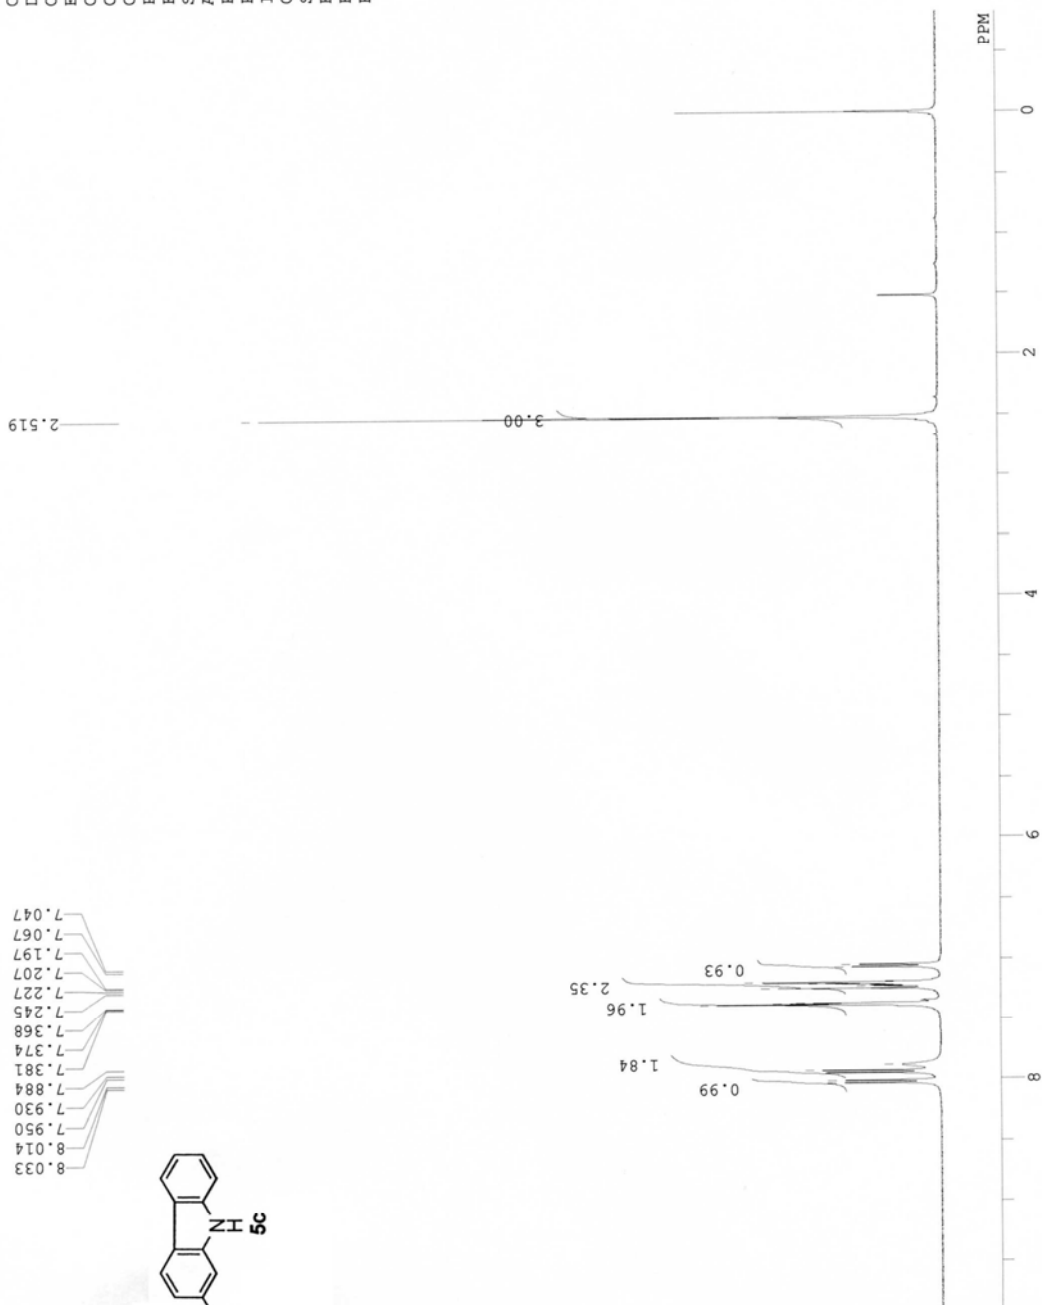

\\Nmr400mhz\seizo\watanabe\Tandem\m-Me carb\BCM\_E16\_Ft.als  
m-Me carb

DFILE \\Nmr400mhz\seizo\watanabe\Tandem\m-Me carb  
COMNT m-Me carb  
DATIM Wed Oct 18 02:44:57 2006  
OBNUC 13C  
EXMOD BCM  
OBERQ 100.40 MHz  
OBSET 125.00 KHz  
OBFIN 10500.0 Hz  
POINT 32768  
FREQU 27118.6 Hz  
SCANS 2048  
ACQTM 1.208 sec  
PD 1.792 sec  
PW1 5.1 us  
IRNUC 1H  
CTEMP 24.1 c  
SLVNT CDCL3  
EXREF 0.00 ppm  
BF 1.20 Hz  
RGAIN 25

0.000

22.047

76.696  
77.017  
77.214  
77.330

110.466  
110.730  
119.341  
120.000  
120.996  
121.070  
123.466  
125.277  
136.021  
139.478  
139.972

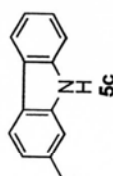

PPM  
0  
25  
50  
75  
100  
125  
150  
175  
200

\\Nmr400mhz\seizo\watanabe\Tandem\4-CO2Me recry 1NON\_E8\_FT.als  
4-CO2Me recry

DFILE \\Nmr400mhz\seizo\wata  
COMNT 4-CO2Me recry  
DATIM Wed Oct 18 17:13:34 20  
OBNUC 1H  
EXMOD NON  
OBFRQ 399.65 MHz  
OBSET 124.00 KHz  
OBFIN 10500.0 Hz  
POINT 32768  
FREQU 7992.0 Hz  
SCANS 16  
ACQTM 4.100 sec  
PD 2.900 sec  
PW1 5.5 us  
IRNUC 1H  
CTEMP 24.4 C  
SLVNT CDCL3  
EXREF 0.00 ppm  
BF 0.12 Hz  
RGAIN 18

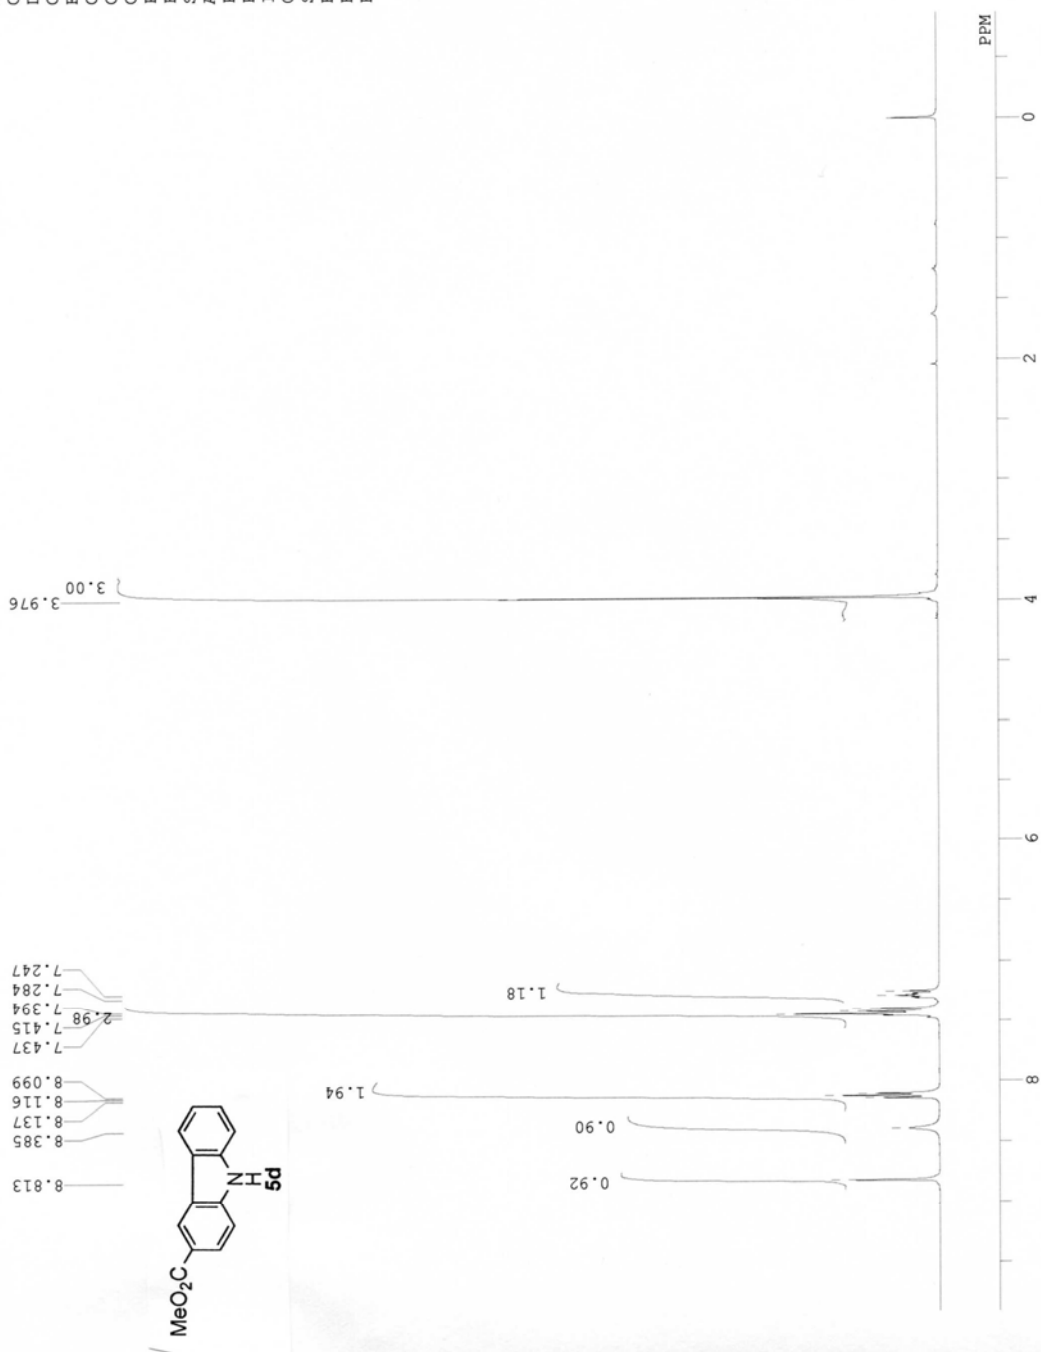

\\Nmr400mhz\seizo\watanabe\Tandem\4-CO2Me recr 1BCM\_E9\_FT.als  
4-CO2Me recr

DFILE \\Nmr400mhz\seizo\wata  
COMNT 4-CO2Me recr  
DATIM Wed Oct 18 18:05:15 20  
OBNUC 13C  
EXMOD BCM  
100.40 MHz  
125.00 KHz  
10500.0 Hz  
32768  
27118.6 Hz  
1024  
SCANS  
ACQTM 1.208 sec  
PD 1.792 sec  
PW1 5.1 us  
1H  
IRNUC 24.1 c  
CTEMP  
SLVNT CDCL3  
EXREF 77.00 ppm  
BF 1.20 Hz  
RGAIN 25

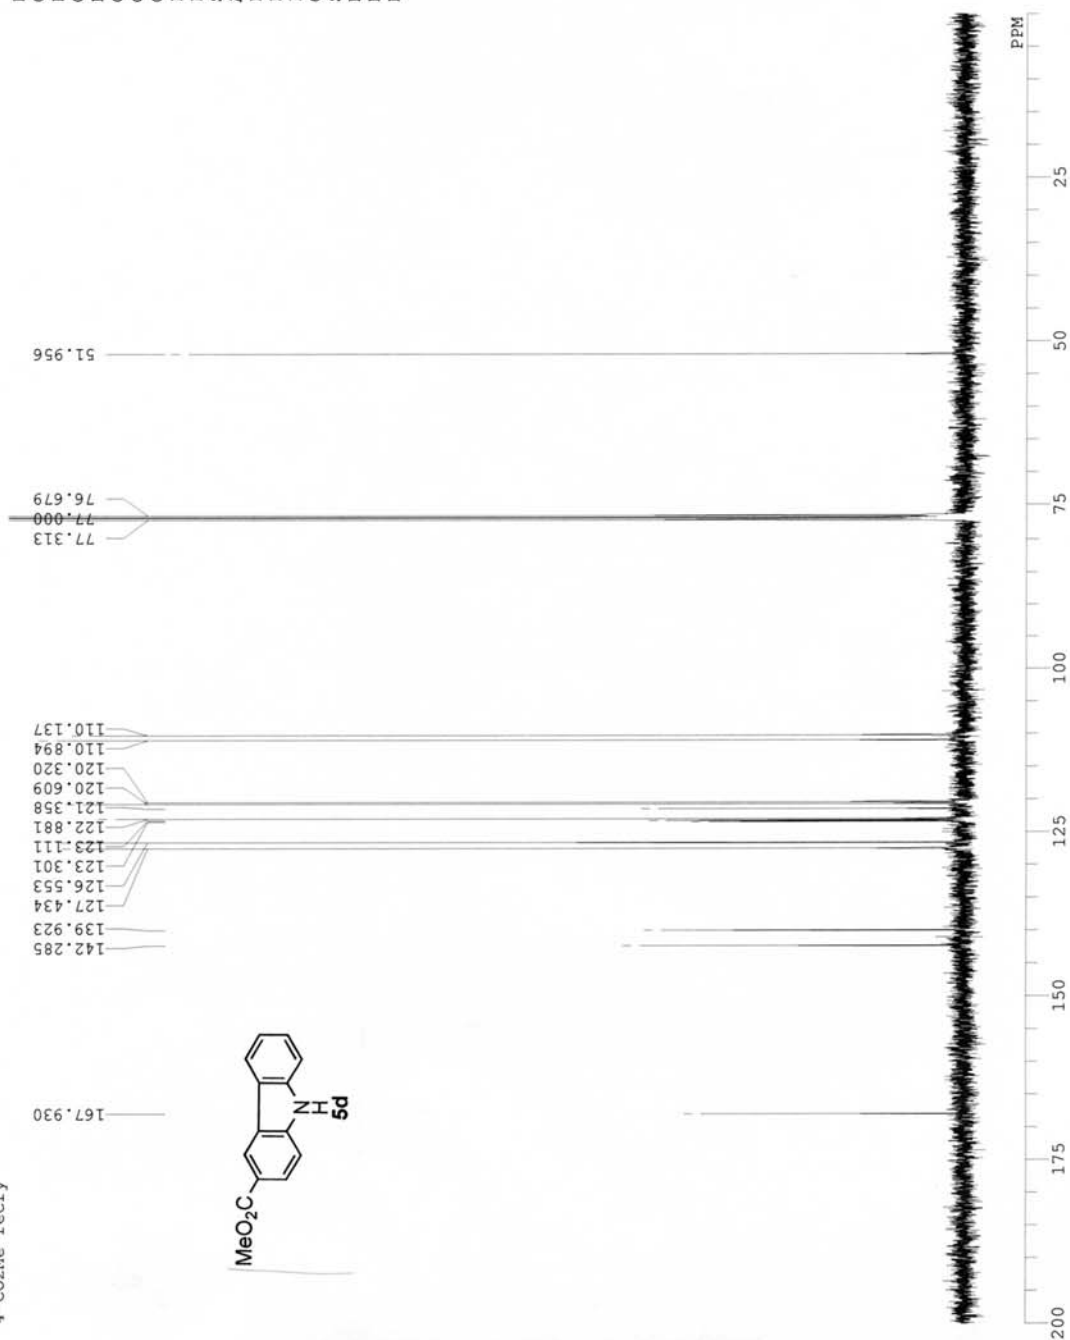

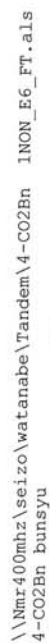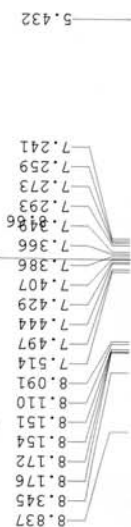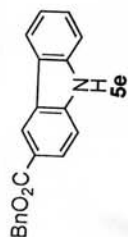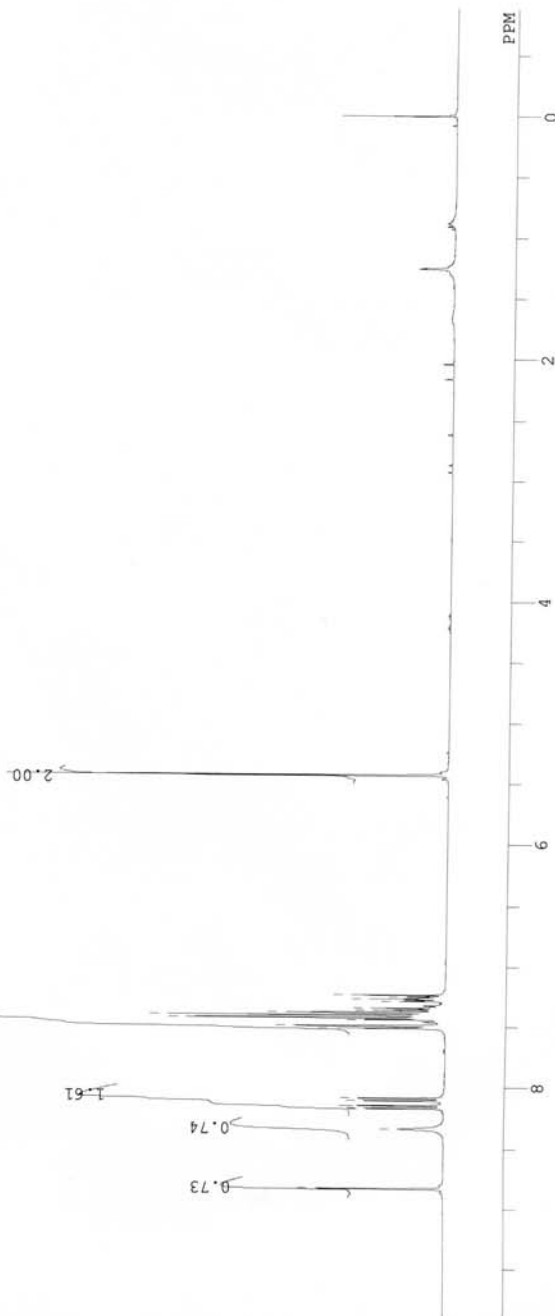

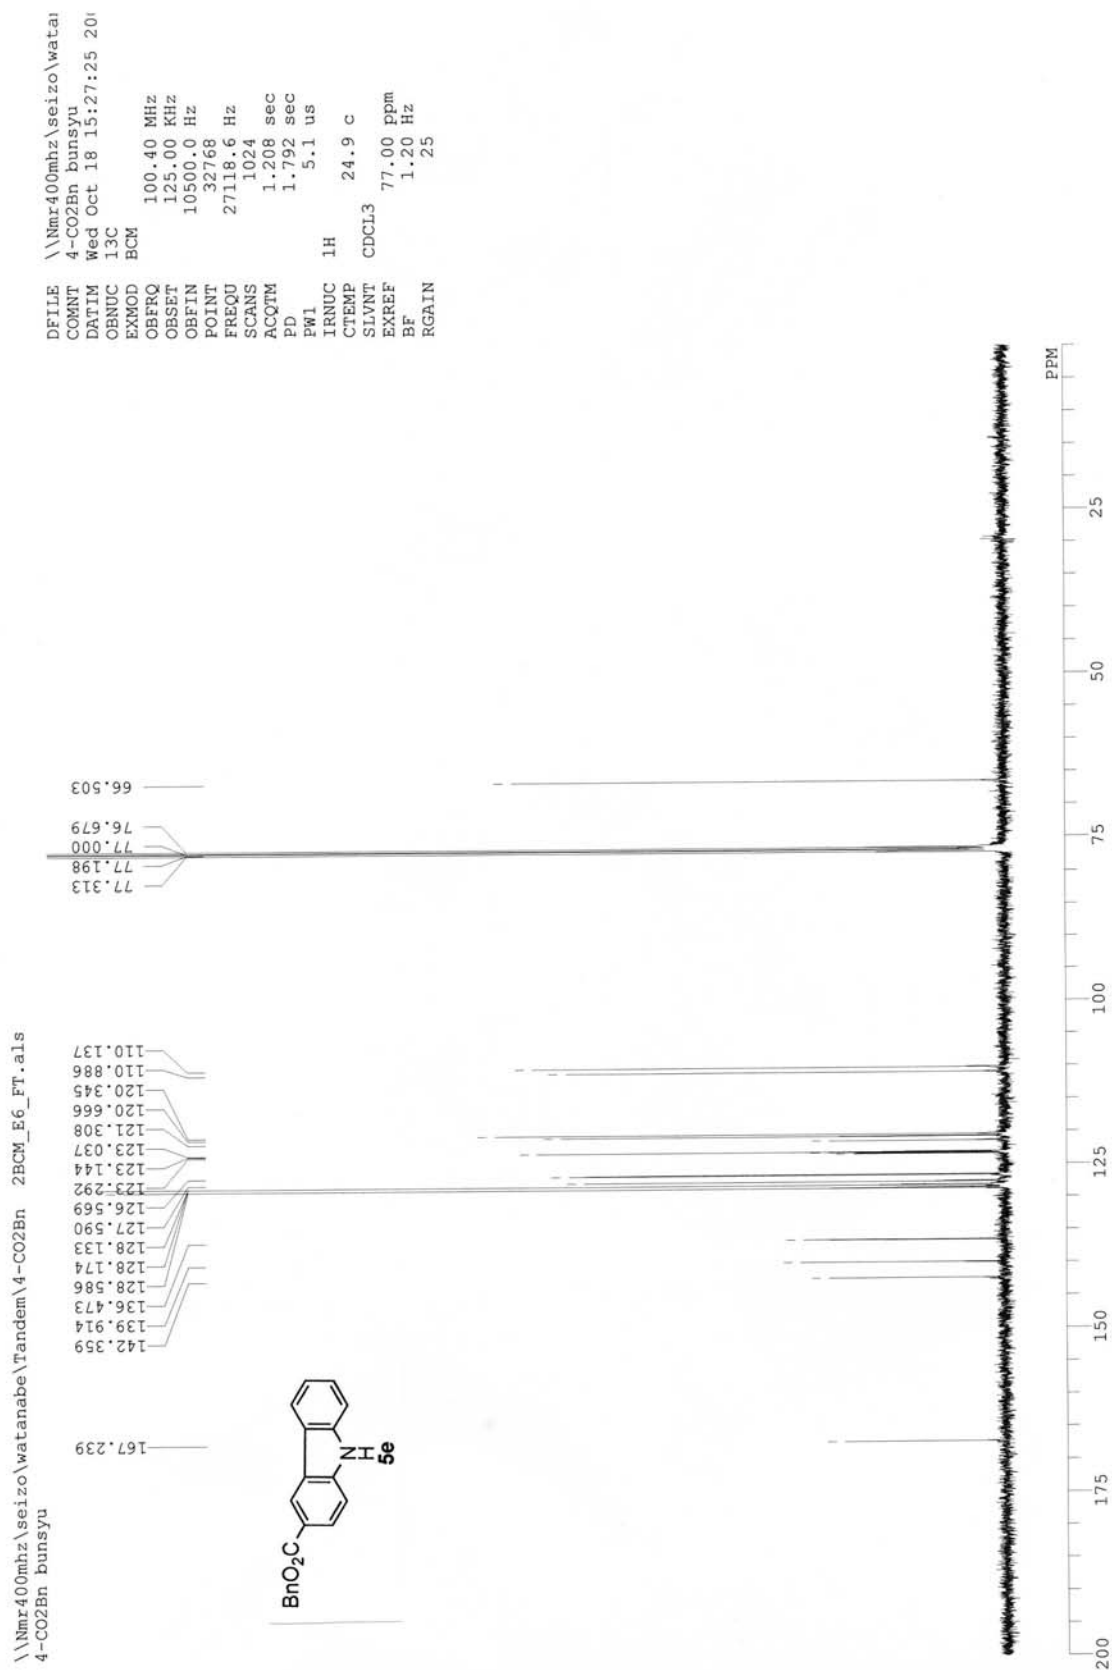



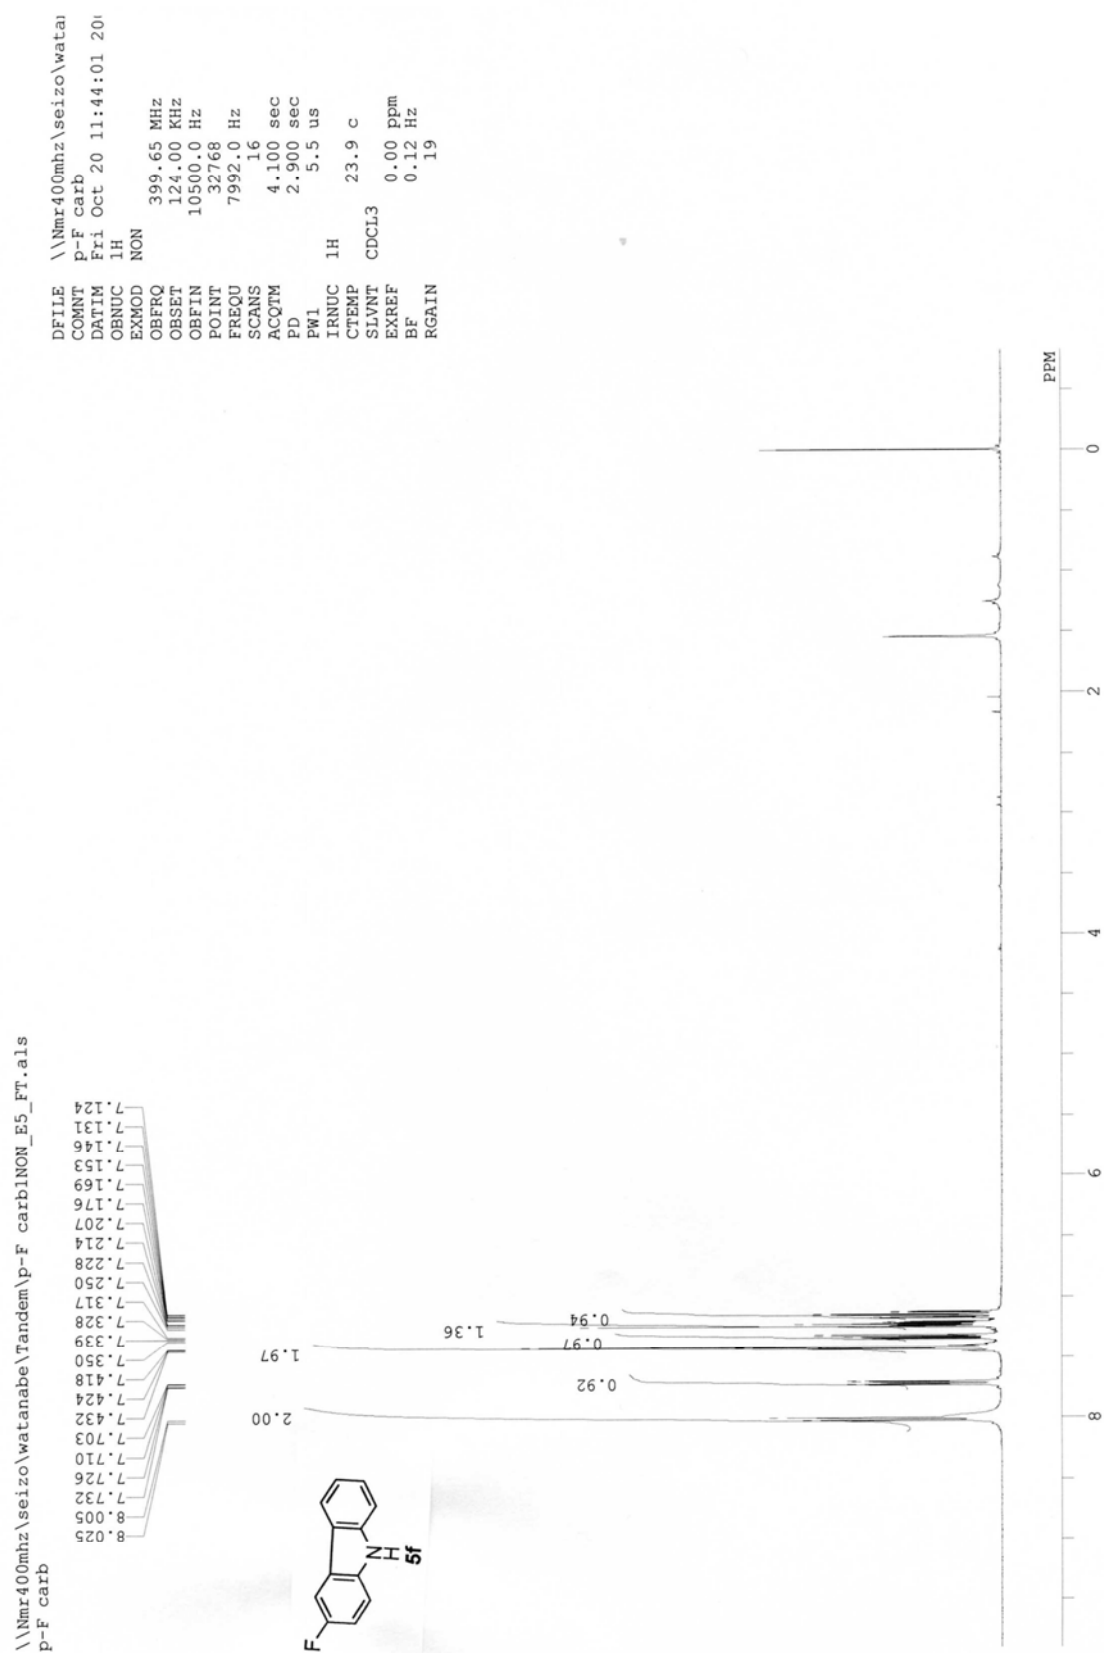

C:\Documents and Settings\seizou\ffxNfgbfv\4-F carb 2BCM\_E34\_FT.als  
4-F carb

DFILE C:\Documents and Settli  
COMNT 4-F carb  
DATIM Fri Oct 20 02:31:33 20  
OBNUC 13C  
EXMOD BCM  
OBFRQ 100.40 MHz  
OBSET 125.00 KHz  
OBFIN 10500.0 Hz  
POINT 32768  
FREQU 27118.6 Hz  
SCANS 4096  
ACQTM 1.208 sec  
PD 1.792 sec  
PW1 5.1 us  
IRNUC 1H  
CTEMP 24.5 c  
SLVNT CDCL3  
EXREF 0.00 ppm  
BF 1.20 Hz  
RGAIN 25

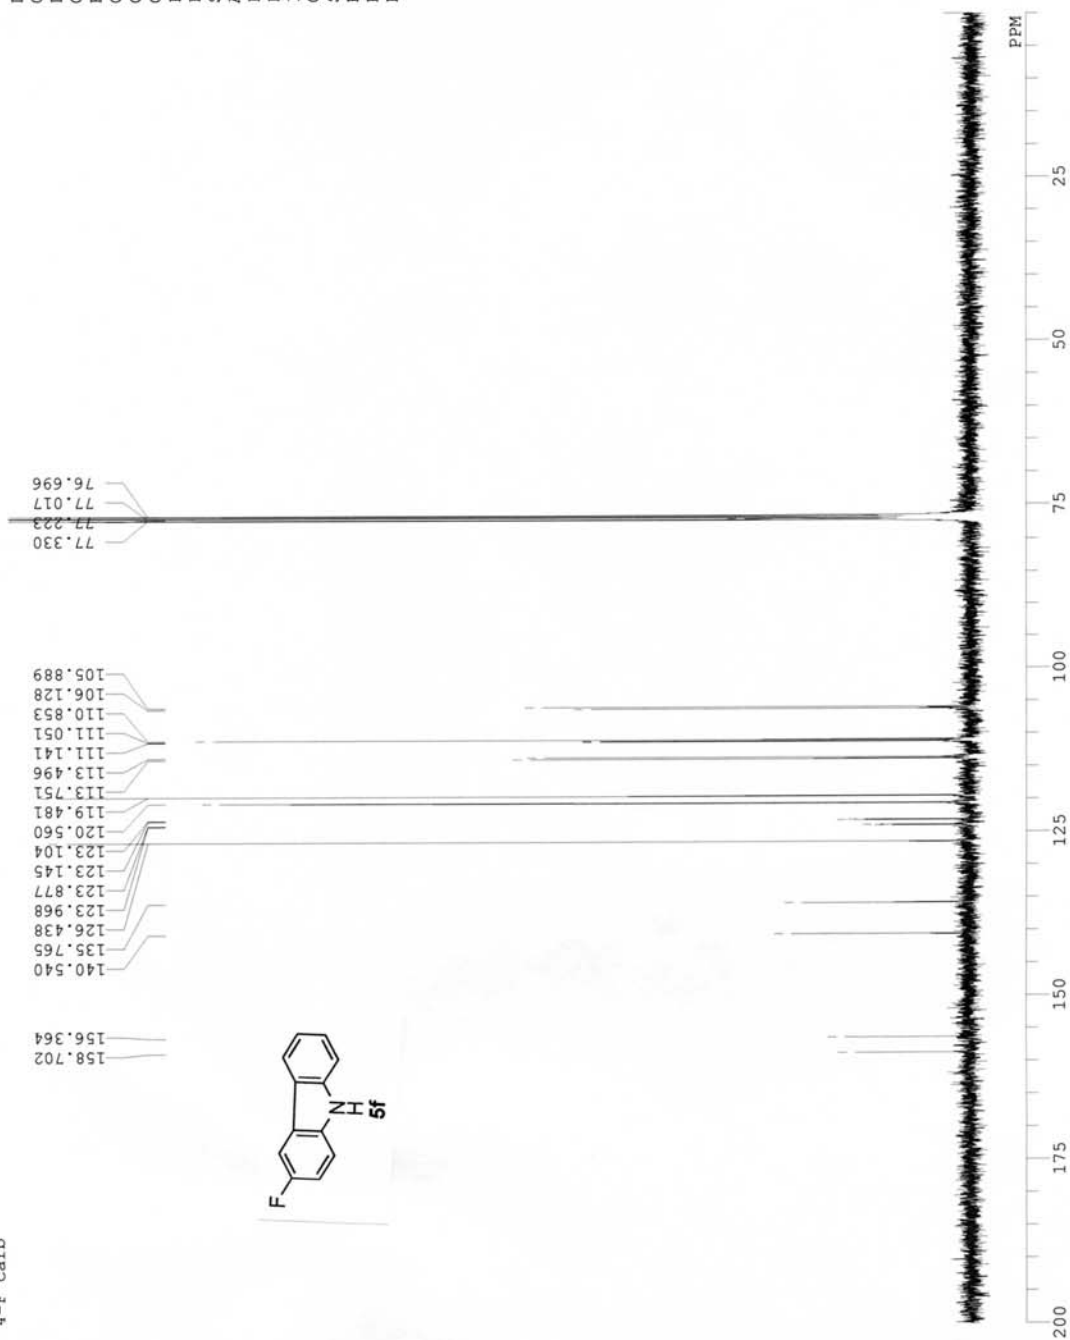

```

\\Nmr400mhz\seizo\watai
4-Ph carb TMS
Sat Oct 21 15:03:02 201
1H
EXMUD NON
OBFRQ 399.65 MHz
OBSET 124.00 KHz
OBFIN 10500.0 Hz
POINT 32768
FREQU 7992.0 Hz
SCANS 8
AQCTM 4.100 sec
PD 2.900 sec
PW1 5.5 us
1H
IRNUC
CTEMP 23.9 C
C4D80
SLVNT
EXREF 3.53 ppm
BF 0.12 Hz
RGAIN 17

```

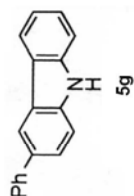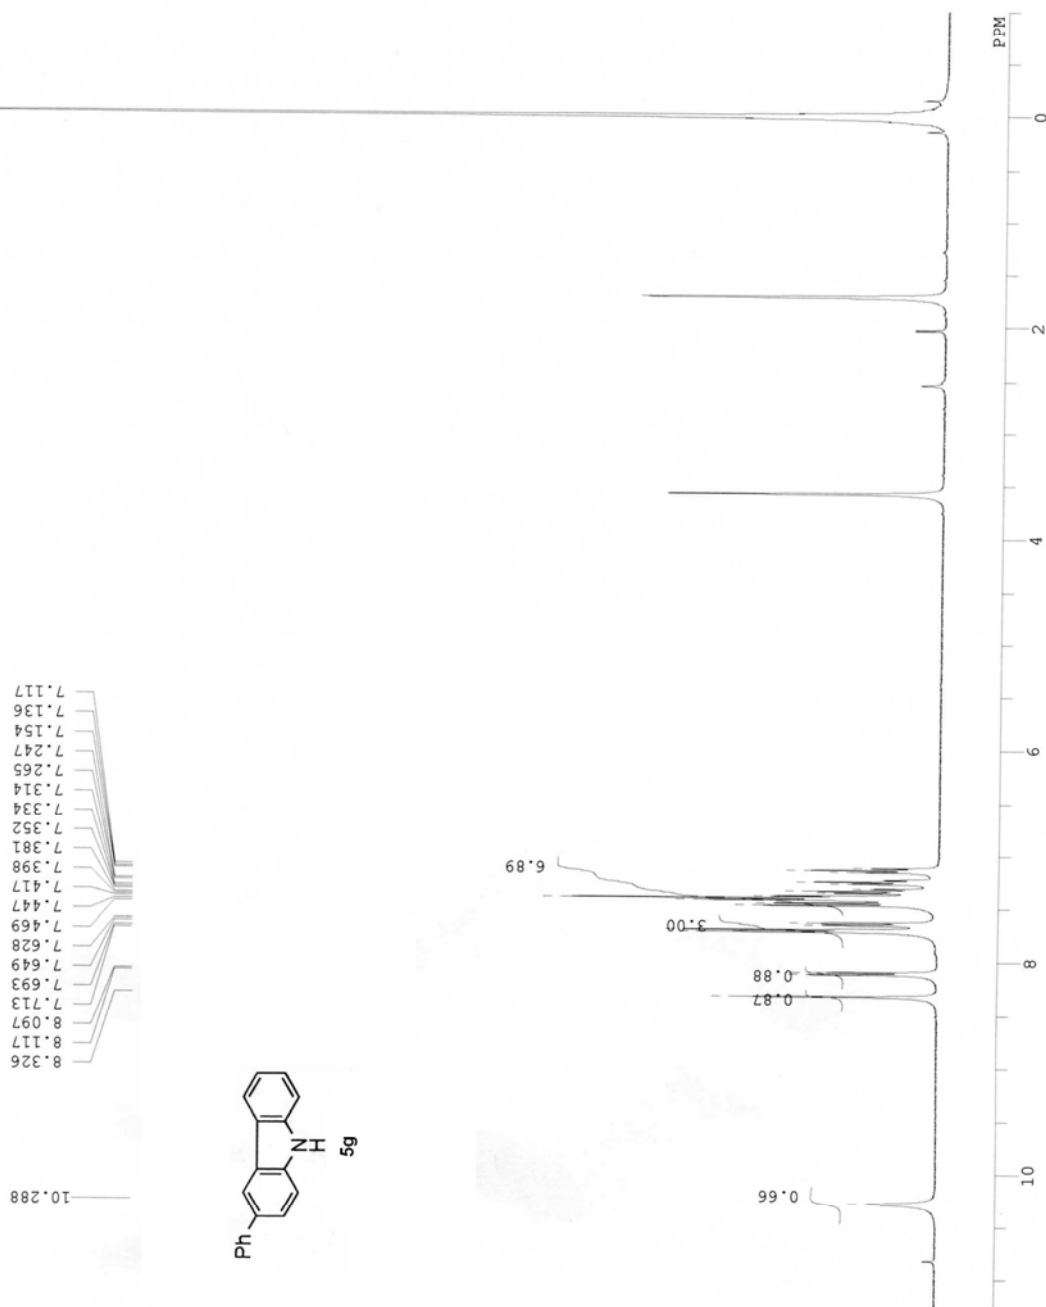

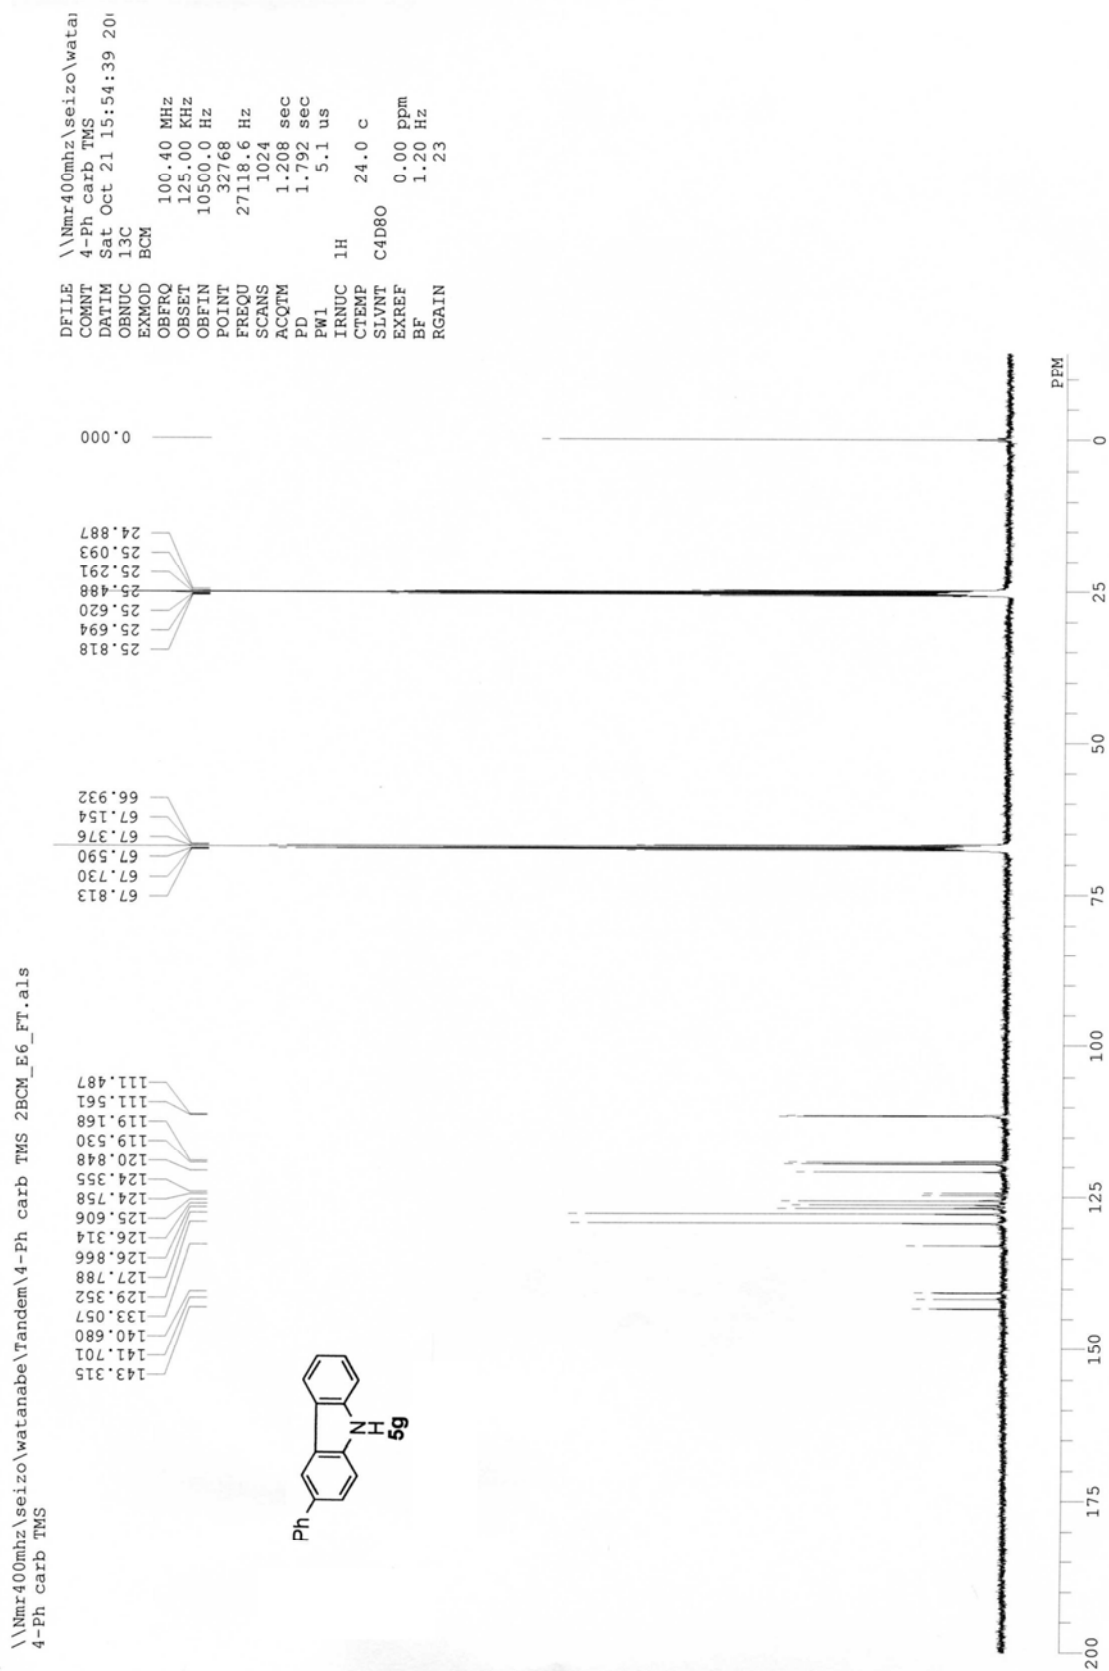

\\Nmr400mhz\seizo\watanabe\Tandem\4-CF3 carb 1NON\_E35\_FT.als  
4-CF3 carb

8.333  
8.187  
8.102  
8.082  
7.654  
7.636  
7.467  
7.457  
7.312  
7.307  
7.292  
7.276  
7.241

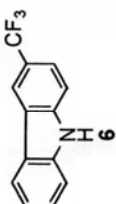

1.94

1.01

0.98

1.26

3.00

DFILE \\Nmr400mhz\seizo\watan  
COMNT 4-CF3 carb  
DATIM Fri Oct 20 02:48:15 20  
OBNUC 1H  
EXMOD NON  
OBFRQ 399.65 MHz  
OBSET 124.00 KHz  
OBFIN 10500.0 Hz  
POINT 32768  
FREQU 7992.0 Hz  
SCANS 64  
AQTM 4.100 sec  
PD 2.900 sec  
FW 5.5 us  
IRNUC 1H  
CTEMP 23.5 c  
SLVNT CDCL3  
EXREF 0.00 ppm  
BF 0.12 Hz  
RGAIN 19

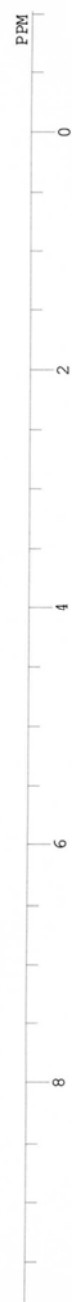

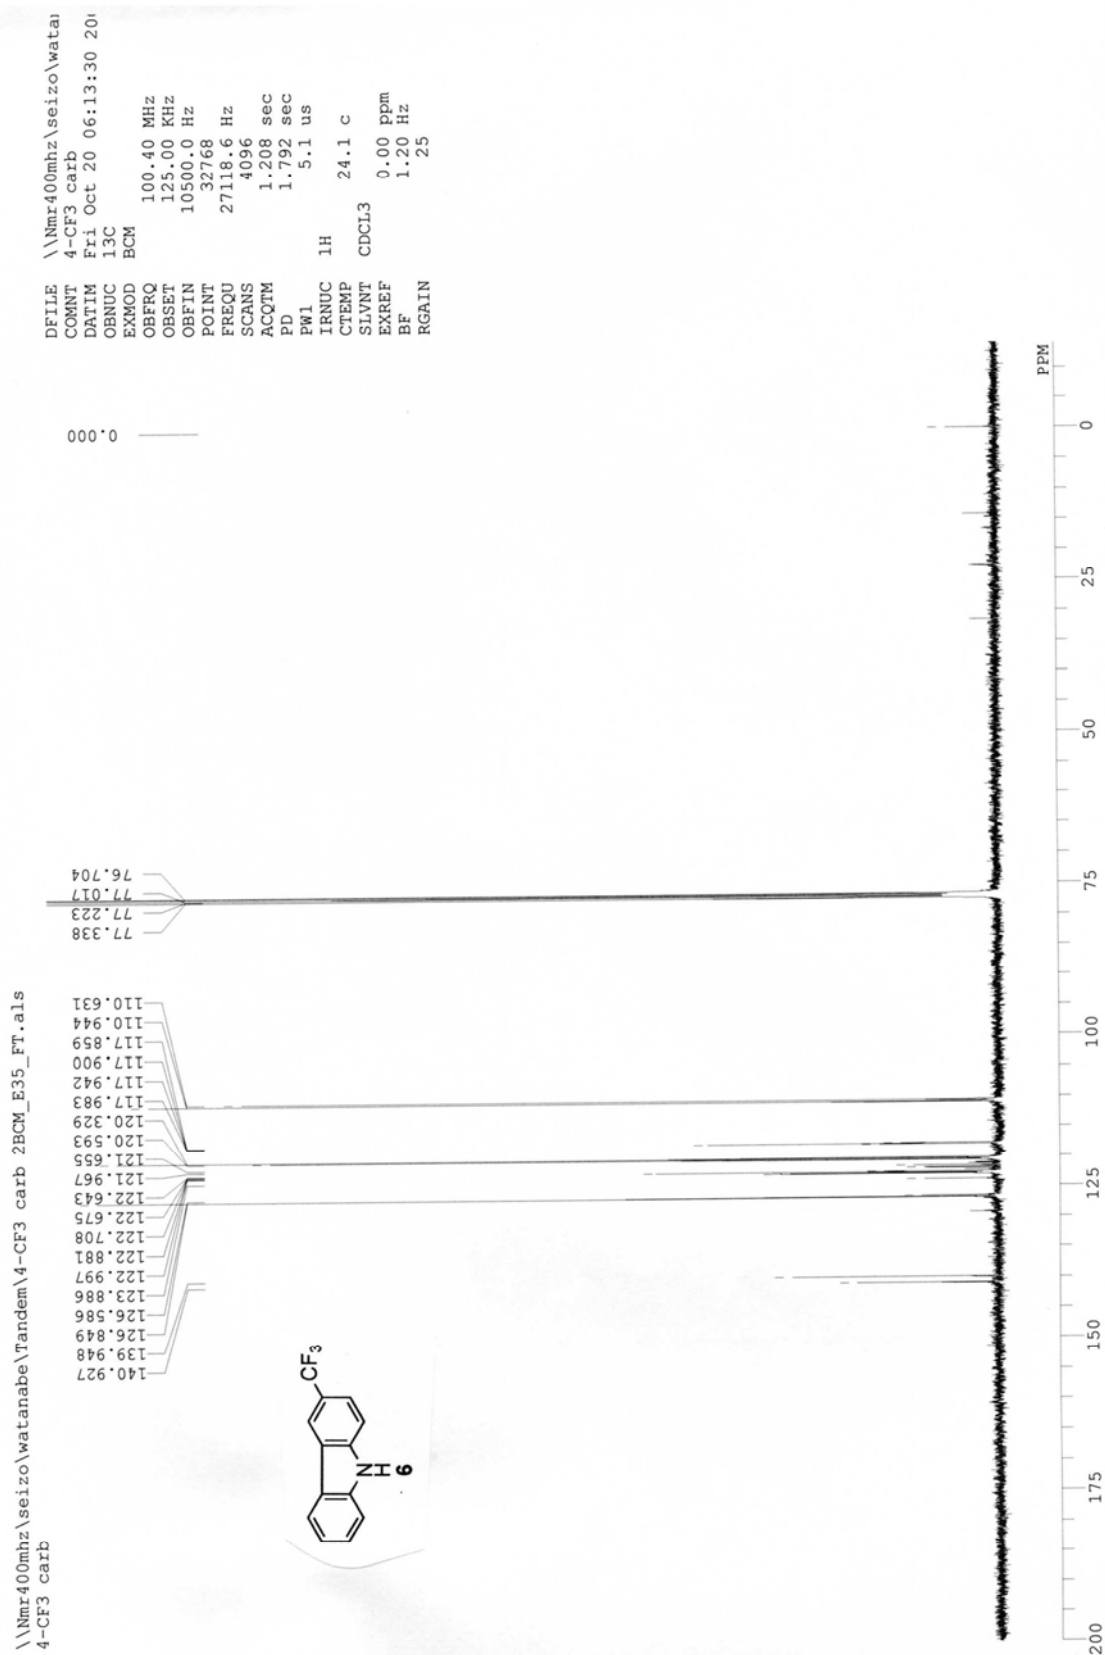

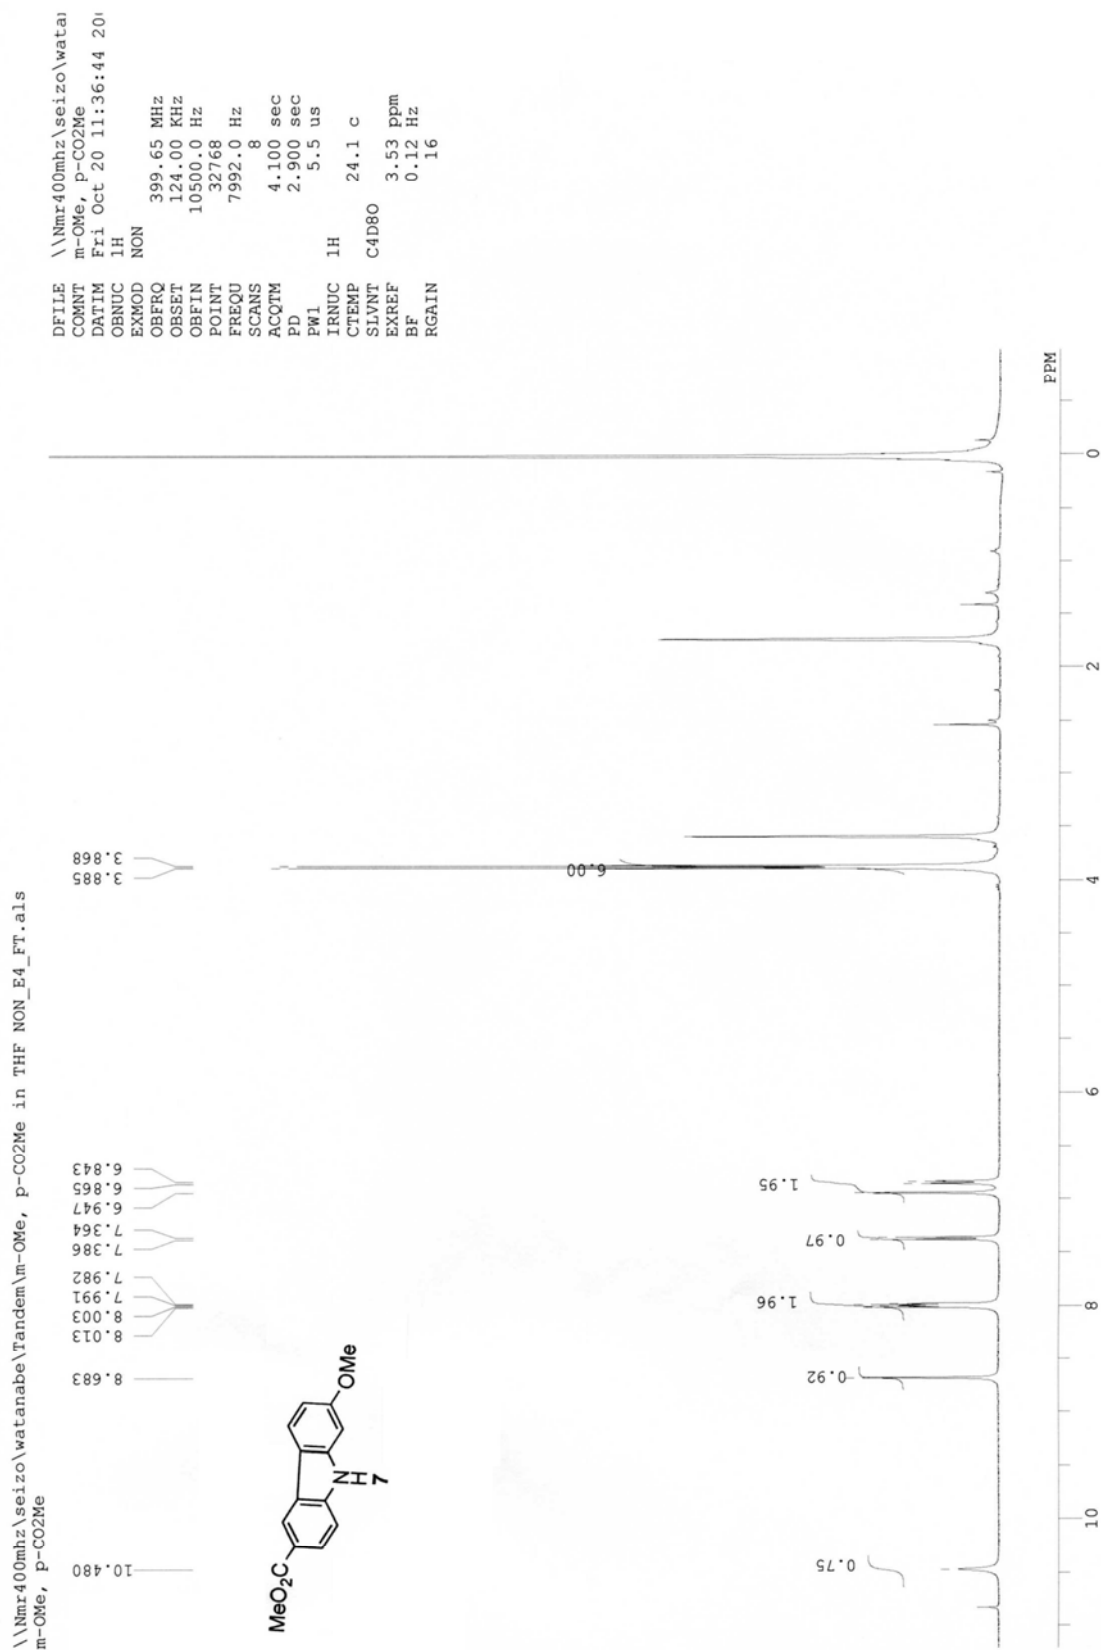

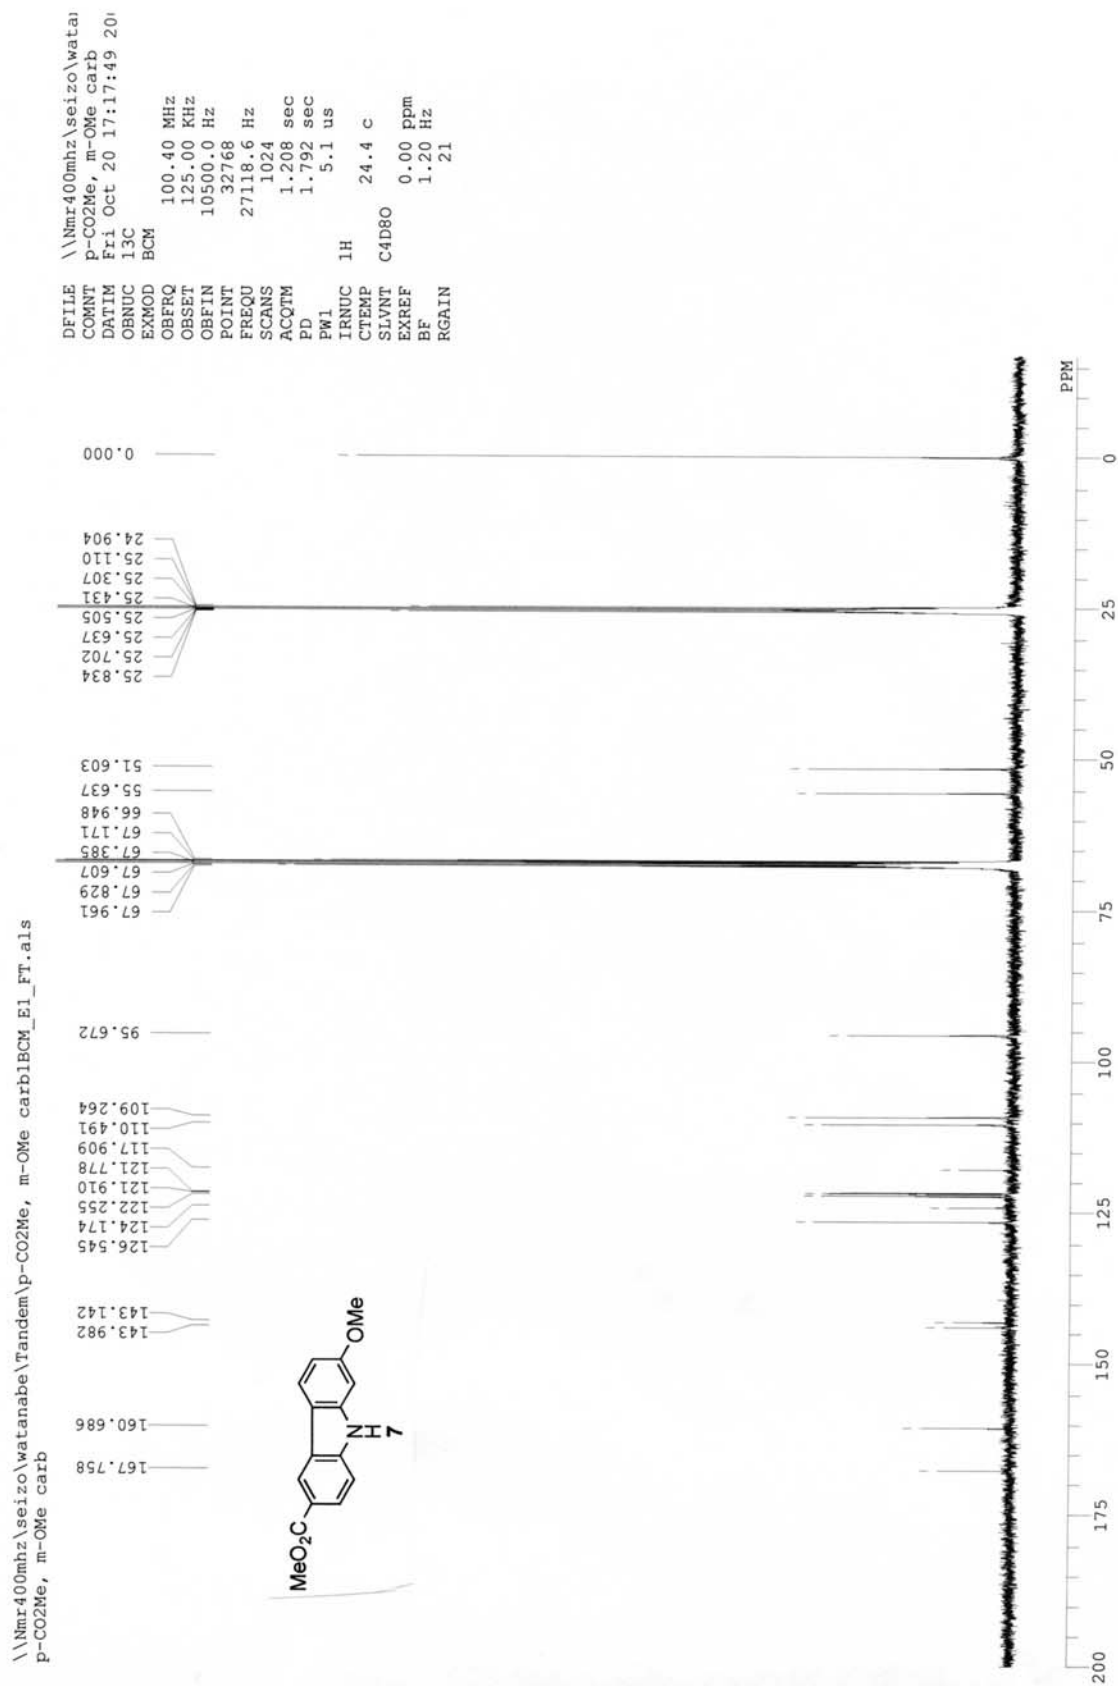



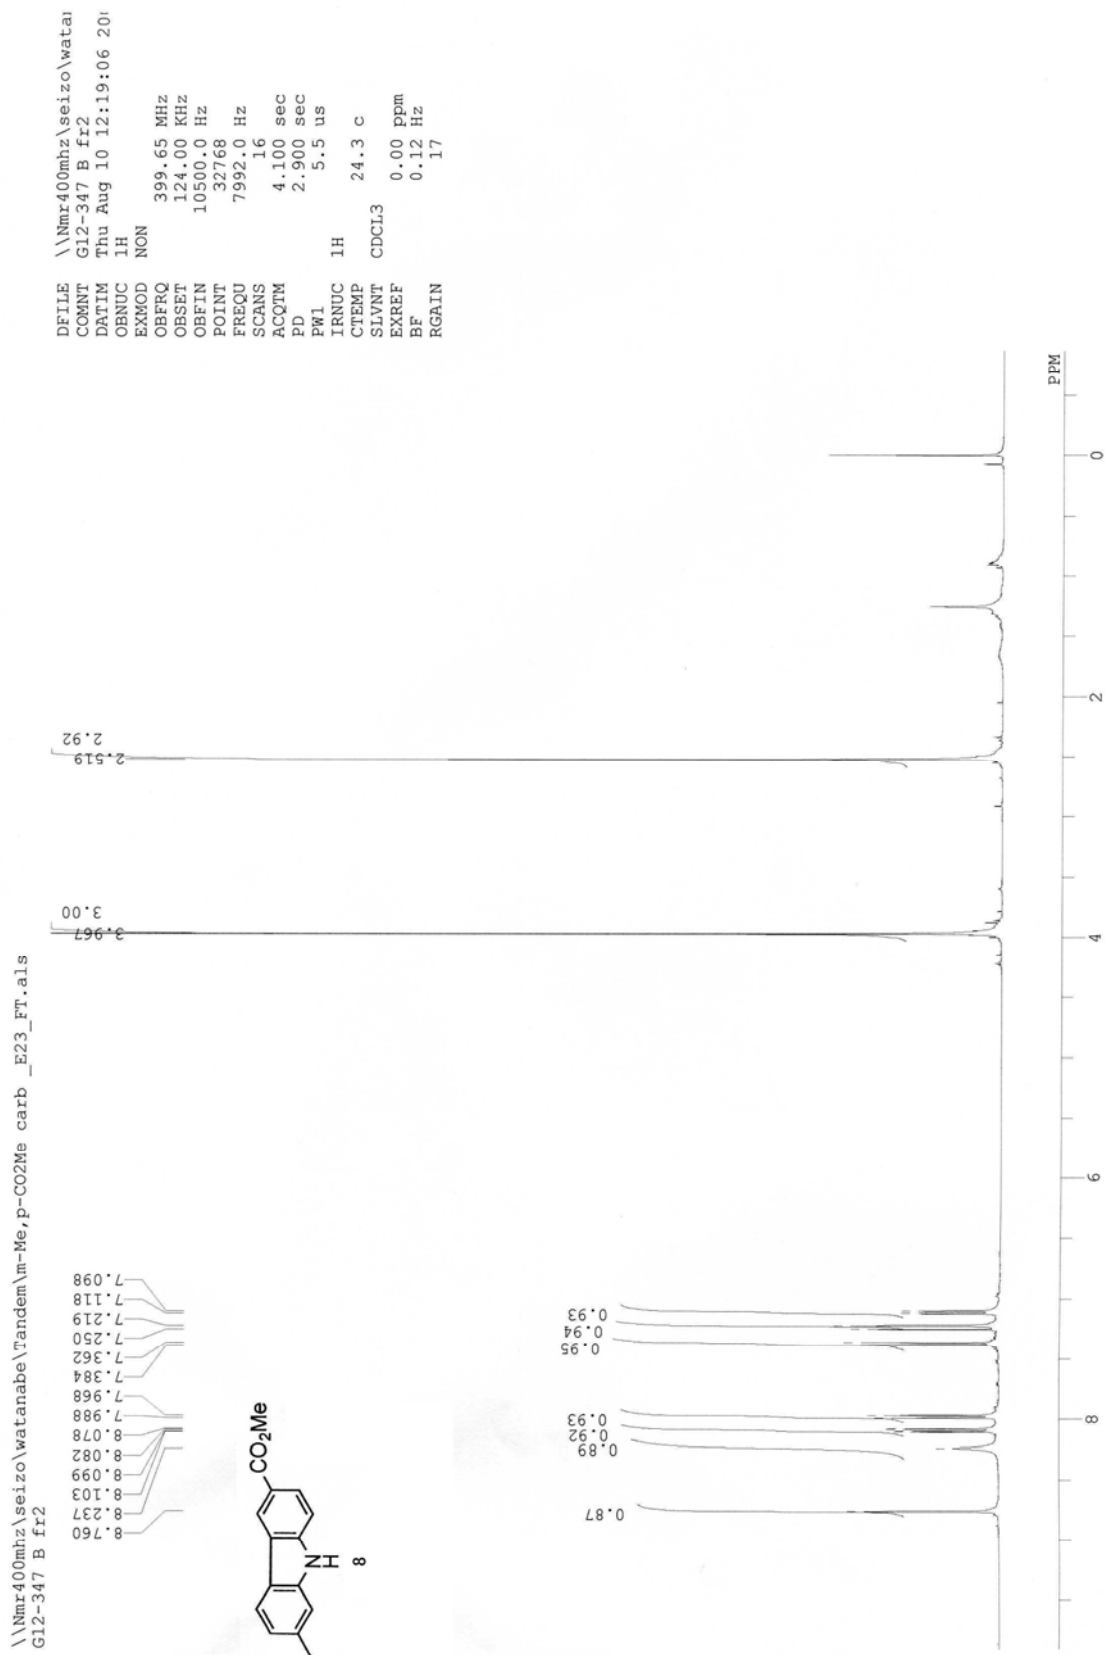

\\Nmr400mhz\seizo\watanabe\Tandem\m-Me,p-CO2Me carb13C1BCM\_E24\_Ft.als  
G12-347 B fr2 13C

DFILE \\Nmr400mhz\seizo\watanabe\Tandem\m-Me,p-CO2Me carb13C1BCM\_E24\_Ft.als  
COMNT G12-347 B fr2 13C  
DATIM Thu Aug 10 14:57:14 2007  
OBNUC 13C  
EXMOD BCM  
OBFRQ 100.40 MHz  
OBSET 125.00 KHz  
OBFIN 10500.0 Hz  
POINT 32768  
FREQU 27118.6 Hz  
SCANS 1024  
ACQTM 1.208 sec  
PD 1.792 sec  
PW1 5.1 us  
IRNUC 1H  
CTEMP 25.1 c  
SLVNT CDCL3  
EXREF 77.00 ppm  
BF 1.20 Hz  
RGAIN 25

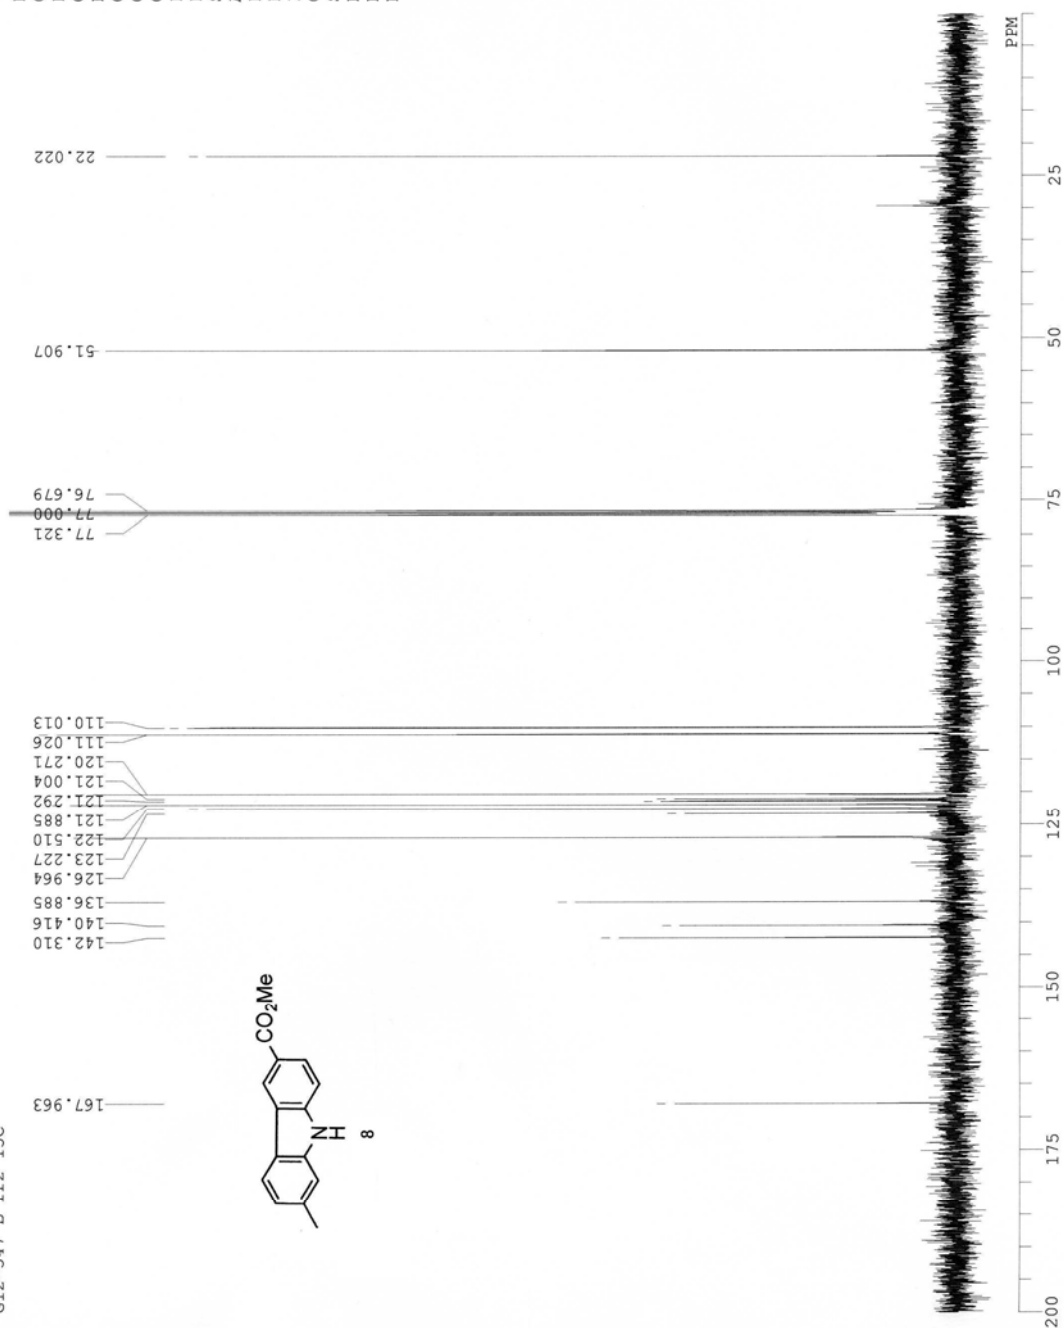

\\Nmr400mhz\seizo\watanabe\Tandem\p-CF3,m-Me carb NON\_E26\_FT.als  
A-34 B

8.274  
8.026  
7.958  
7.938  
7.610  
7.589  
7.404  
7.382  
7.235  
7.196  
7.116  
7.096

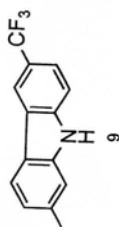

DFILE \\Nmr400mhz\seizo\watan  
COMNT A-34 B  
DATIM Tue Aug 29 03:20:21 20  
OBNUC 1H  
EXMOD NON  
OBERQ 399.65 MHz  
OBSET 124.00 KHz  
OBFIN 10500.0 Hz  
POINT 32768  
FREQU 7992.0 Hz  
SCANS 16  
AQTM 4.100 sec  
PD 2.900 sec  
PW1 5.5 us  
IRNUC 1H  
CTEMP 24.1 c  
SLVNT CDCL3  
EXREF 0.00 ppm  
BF 0.12 Hz  
RGAIN 17

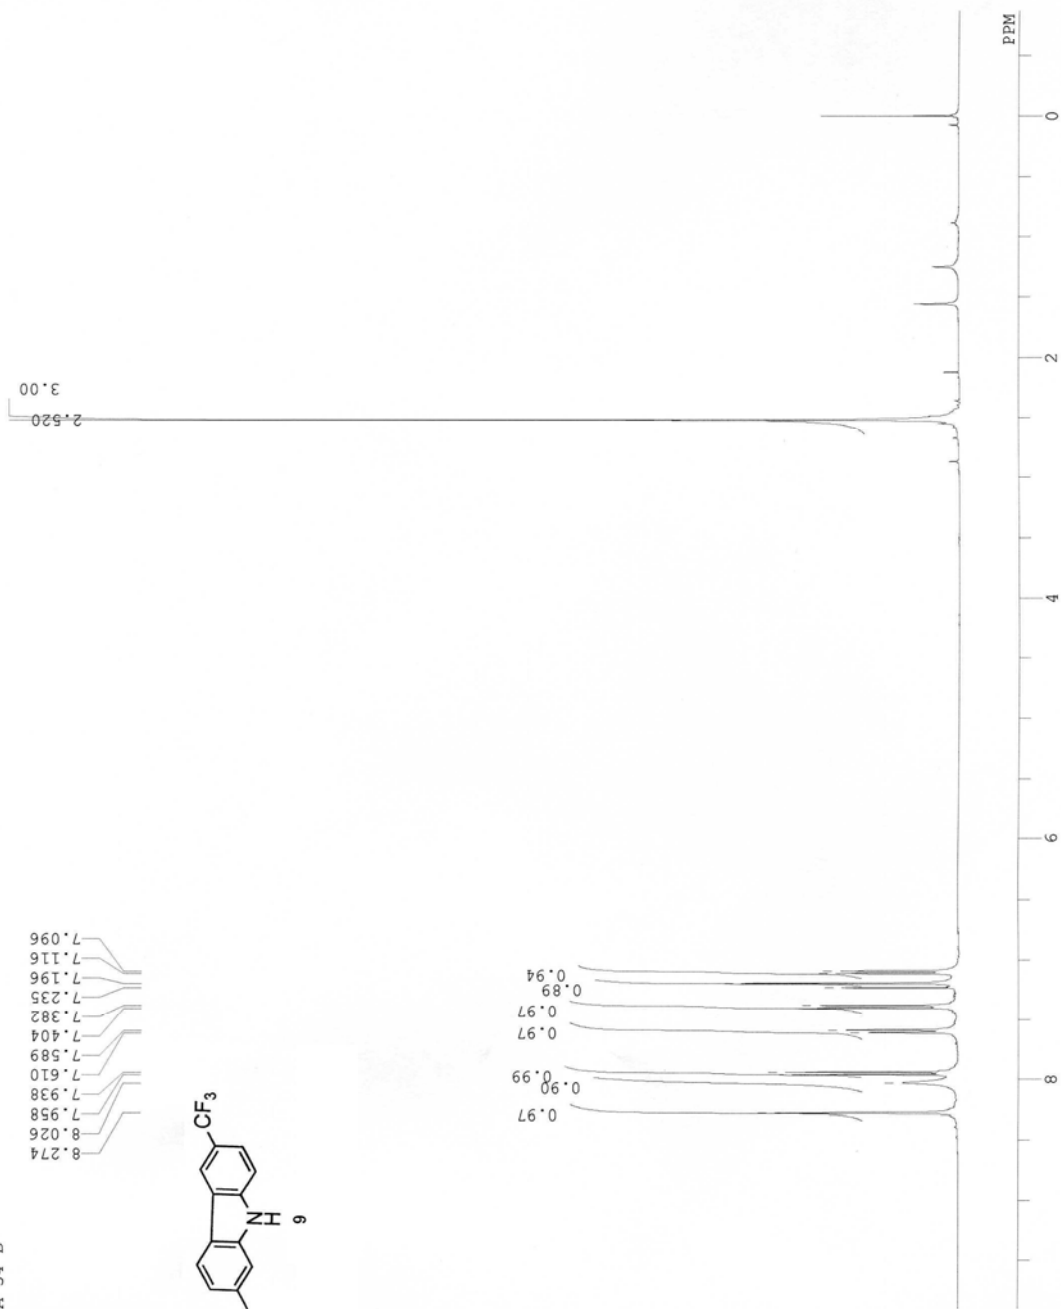

C:\Documents and Settings\seizou\ffx\Nfgbfv\A-34 B2BCM\_E26\_FT.als  
A-34 B

DFILE C:\Documents and Settli  
A-34 B  
COMNT Tue Aug 29 04:11:58 20  
DATIM 13C  
OBNUC BCM  
EXMOD 100.40 MHz  
OBFRO 125.00 KHz  
OBSET 10500.0 Hz  
OBFIN 32768  
POINT 27118.6 Hz  
FREQU 1024  
SCANS 1.208 sec  
ACQTM 1.792 sec  
PD 5.1 us  
PW1 1H  
IRNUC 24.5 c  
CTEMP CDCL3  
SLVNT 77.00 ppm  
EXREF 1.20 Hz  
BF 25  
RGAIN

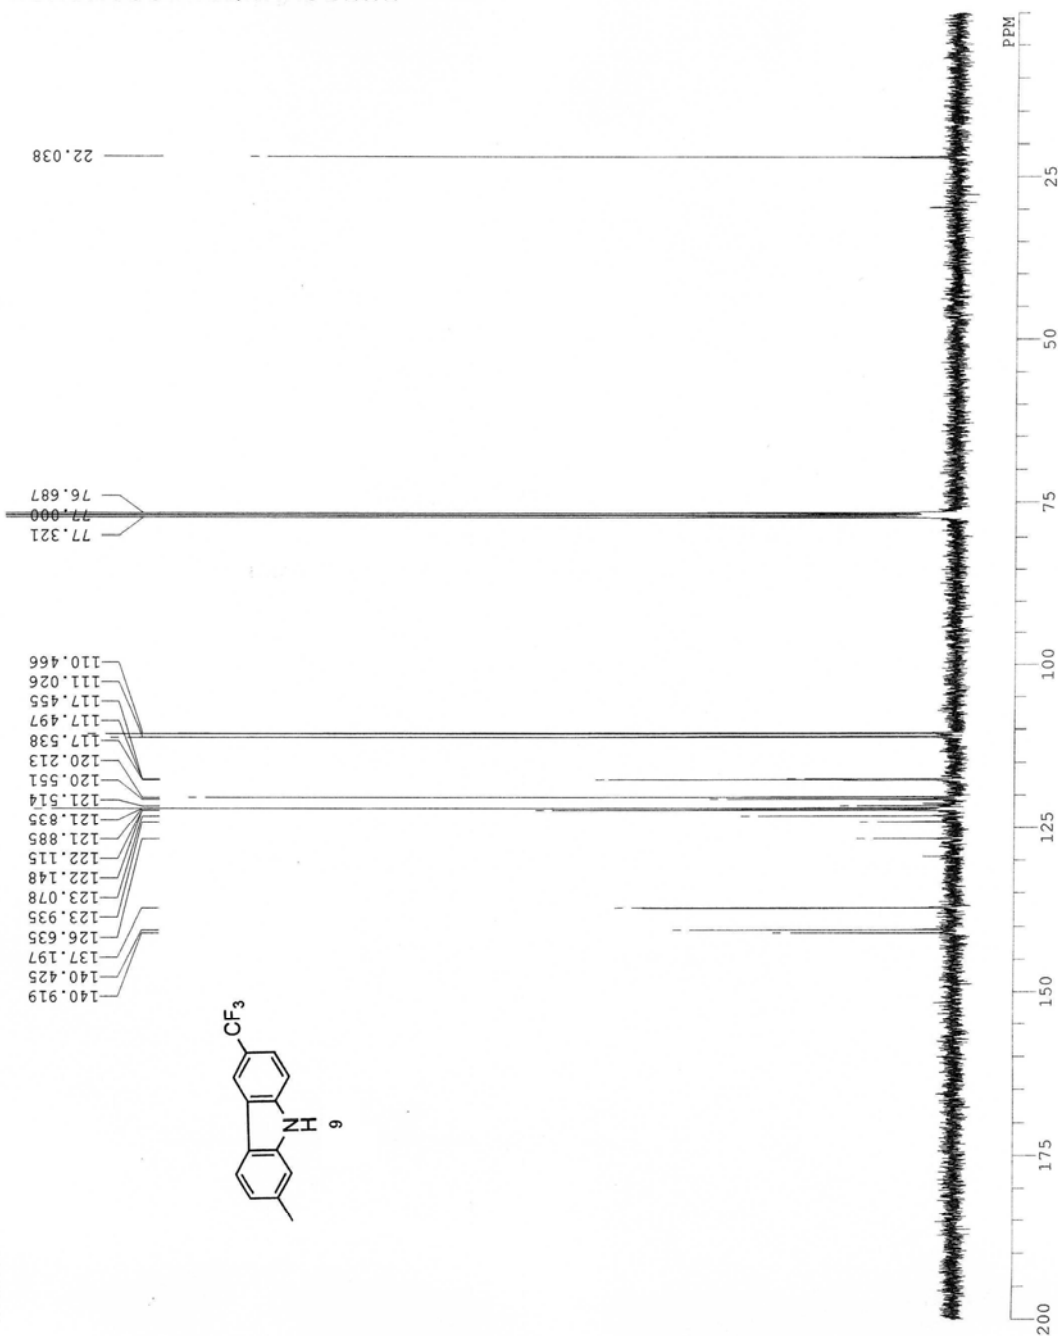

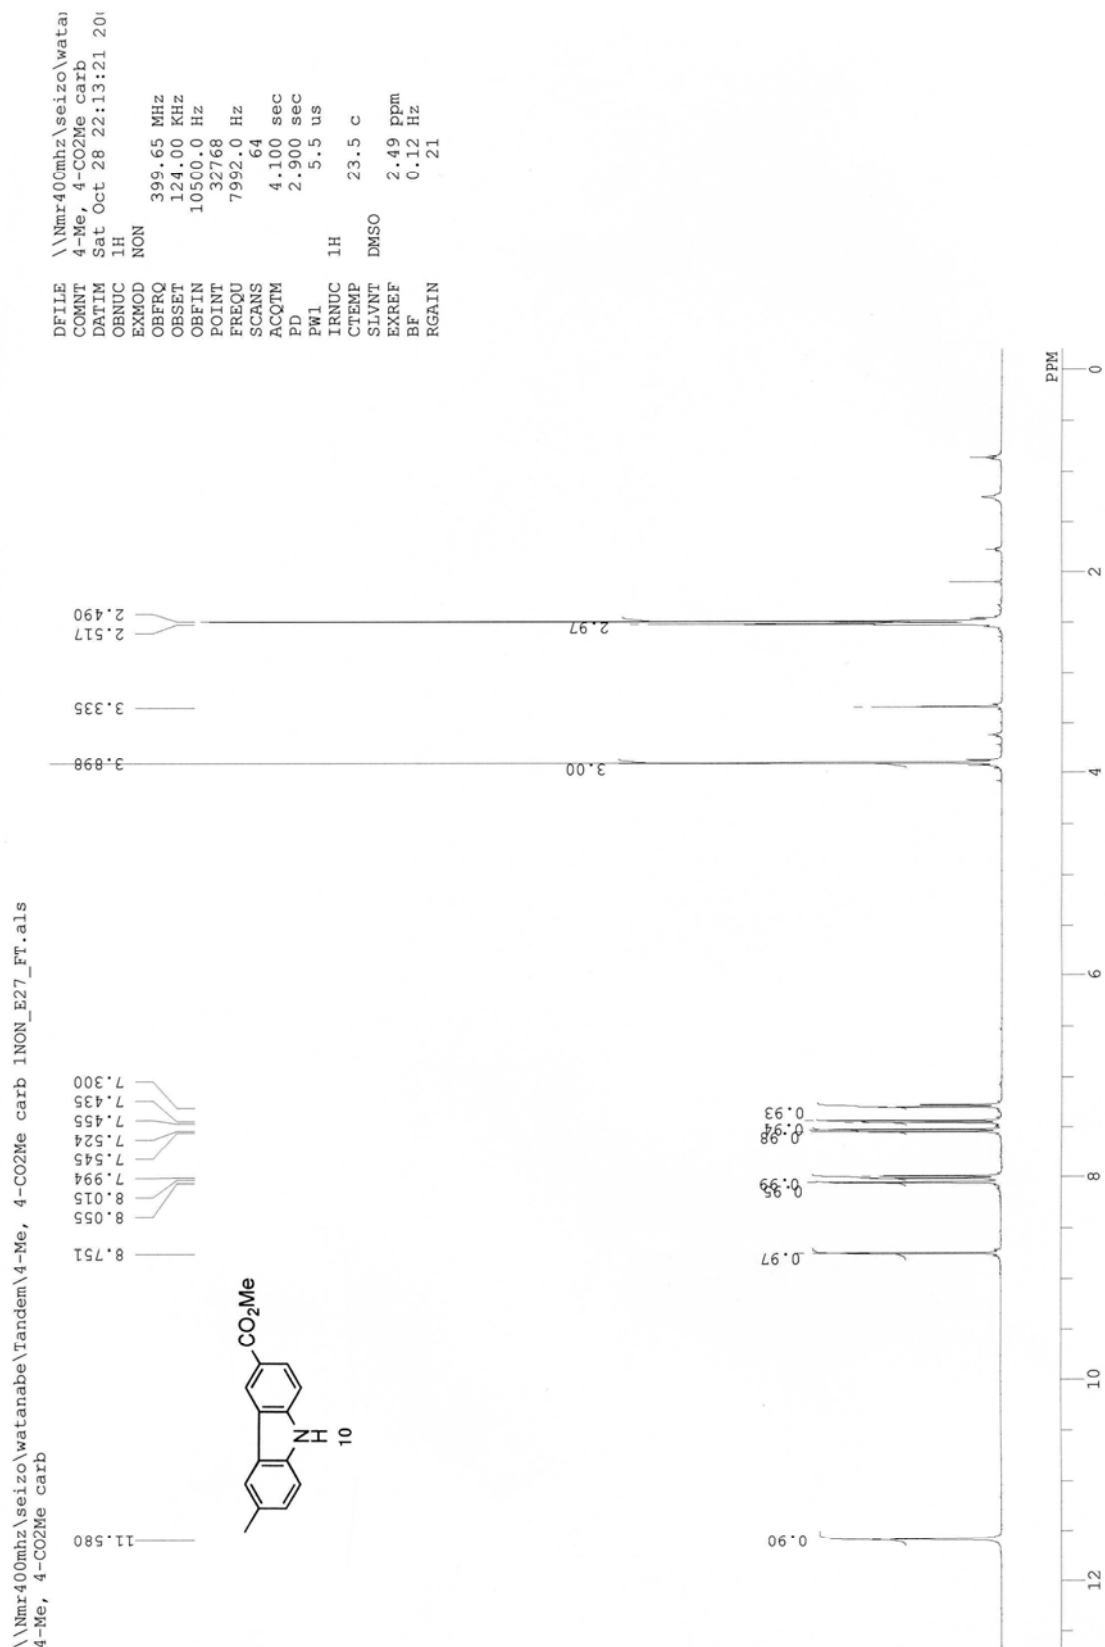

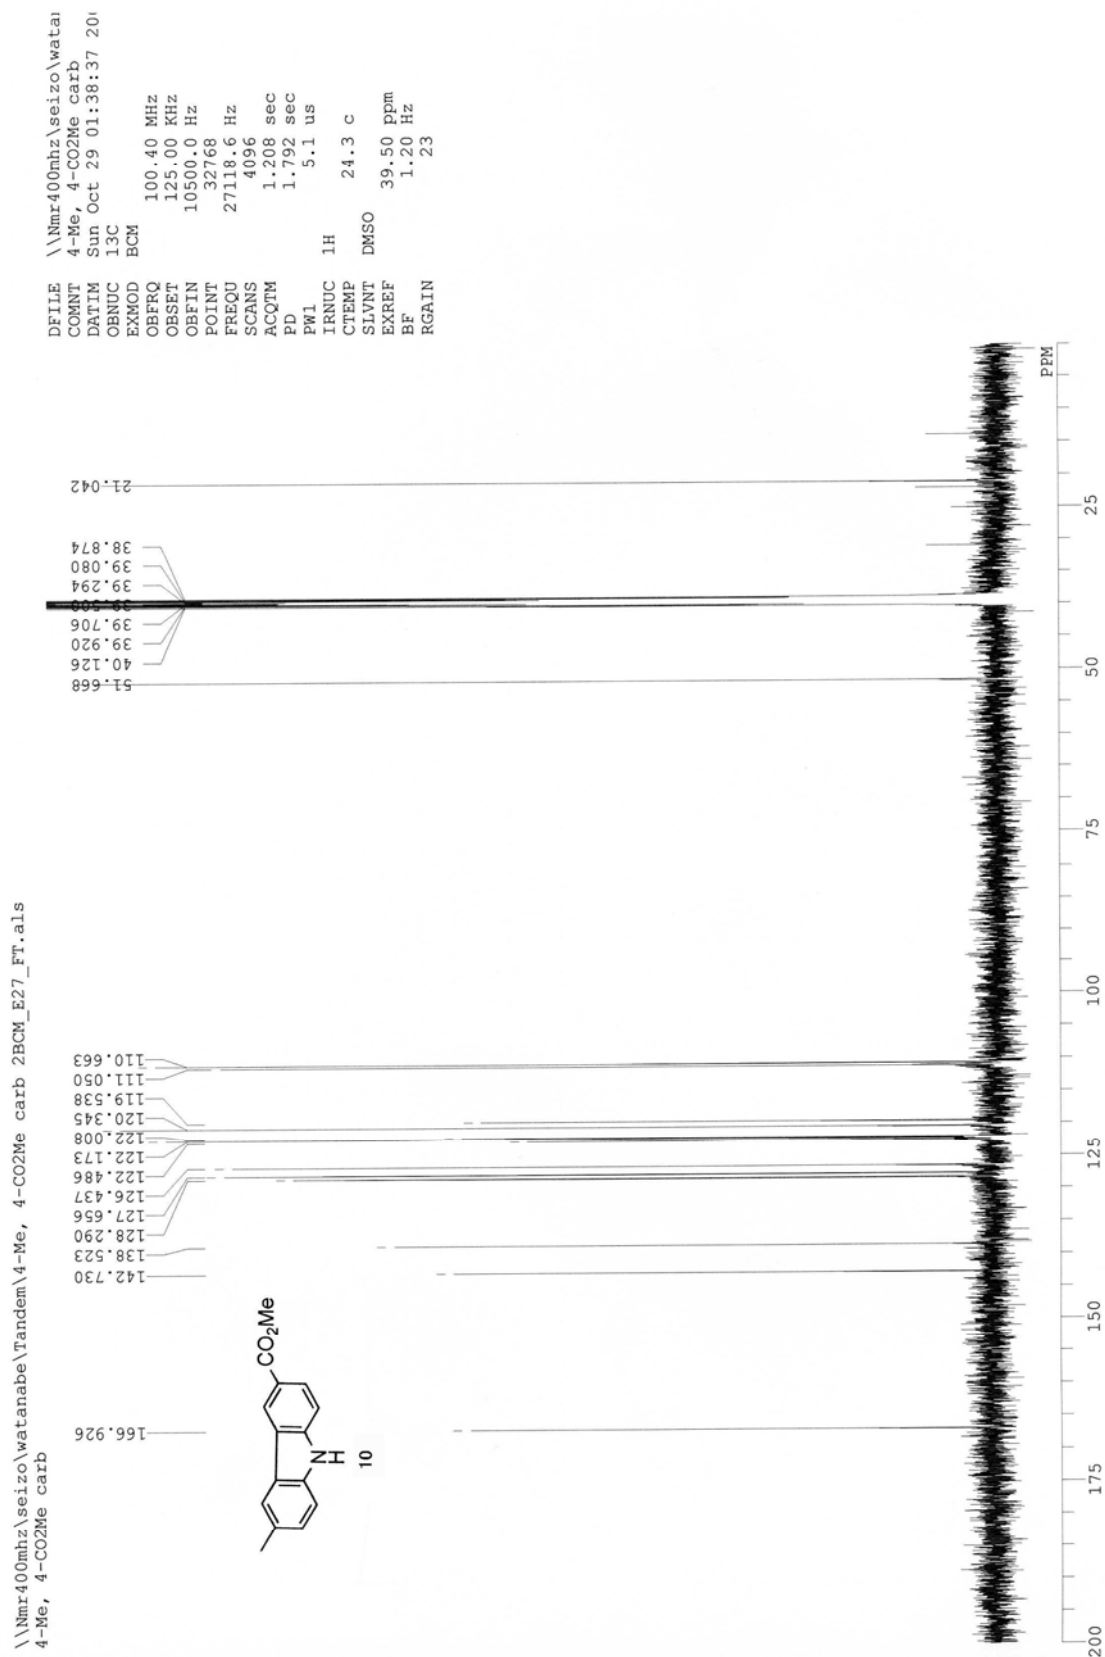

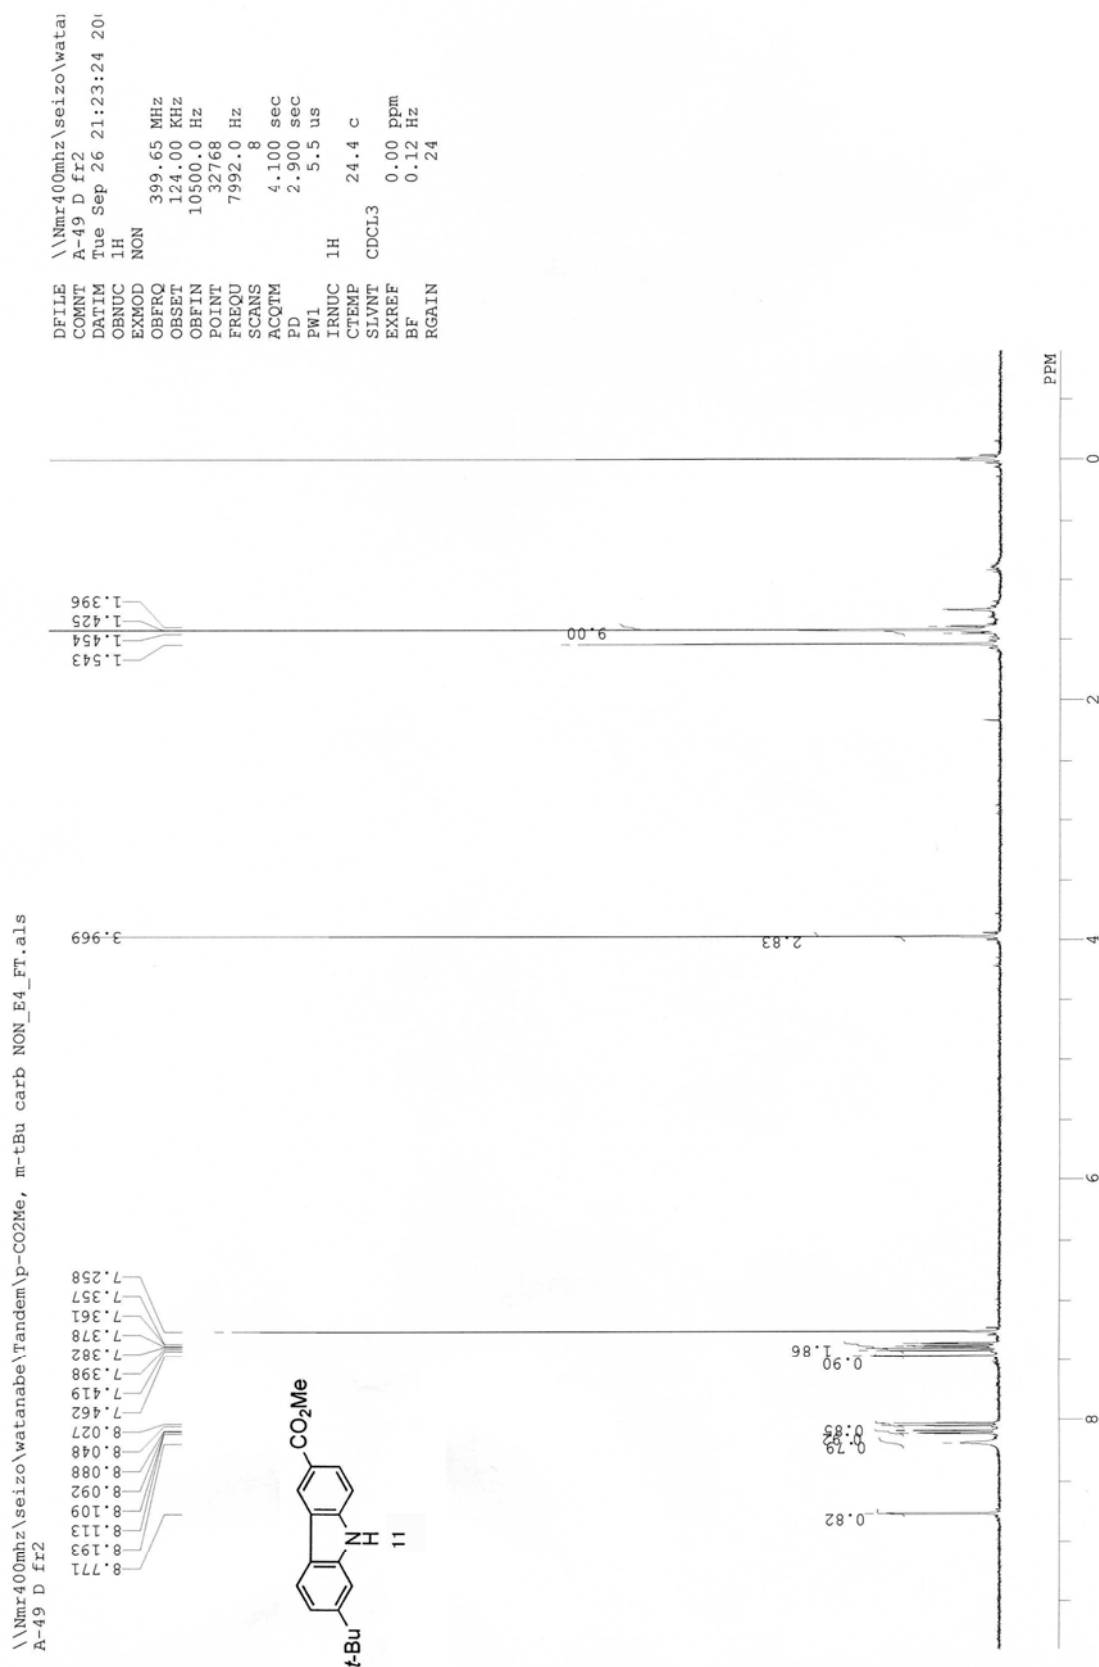

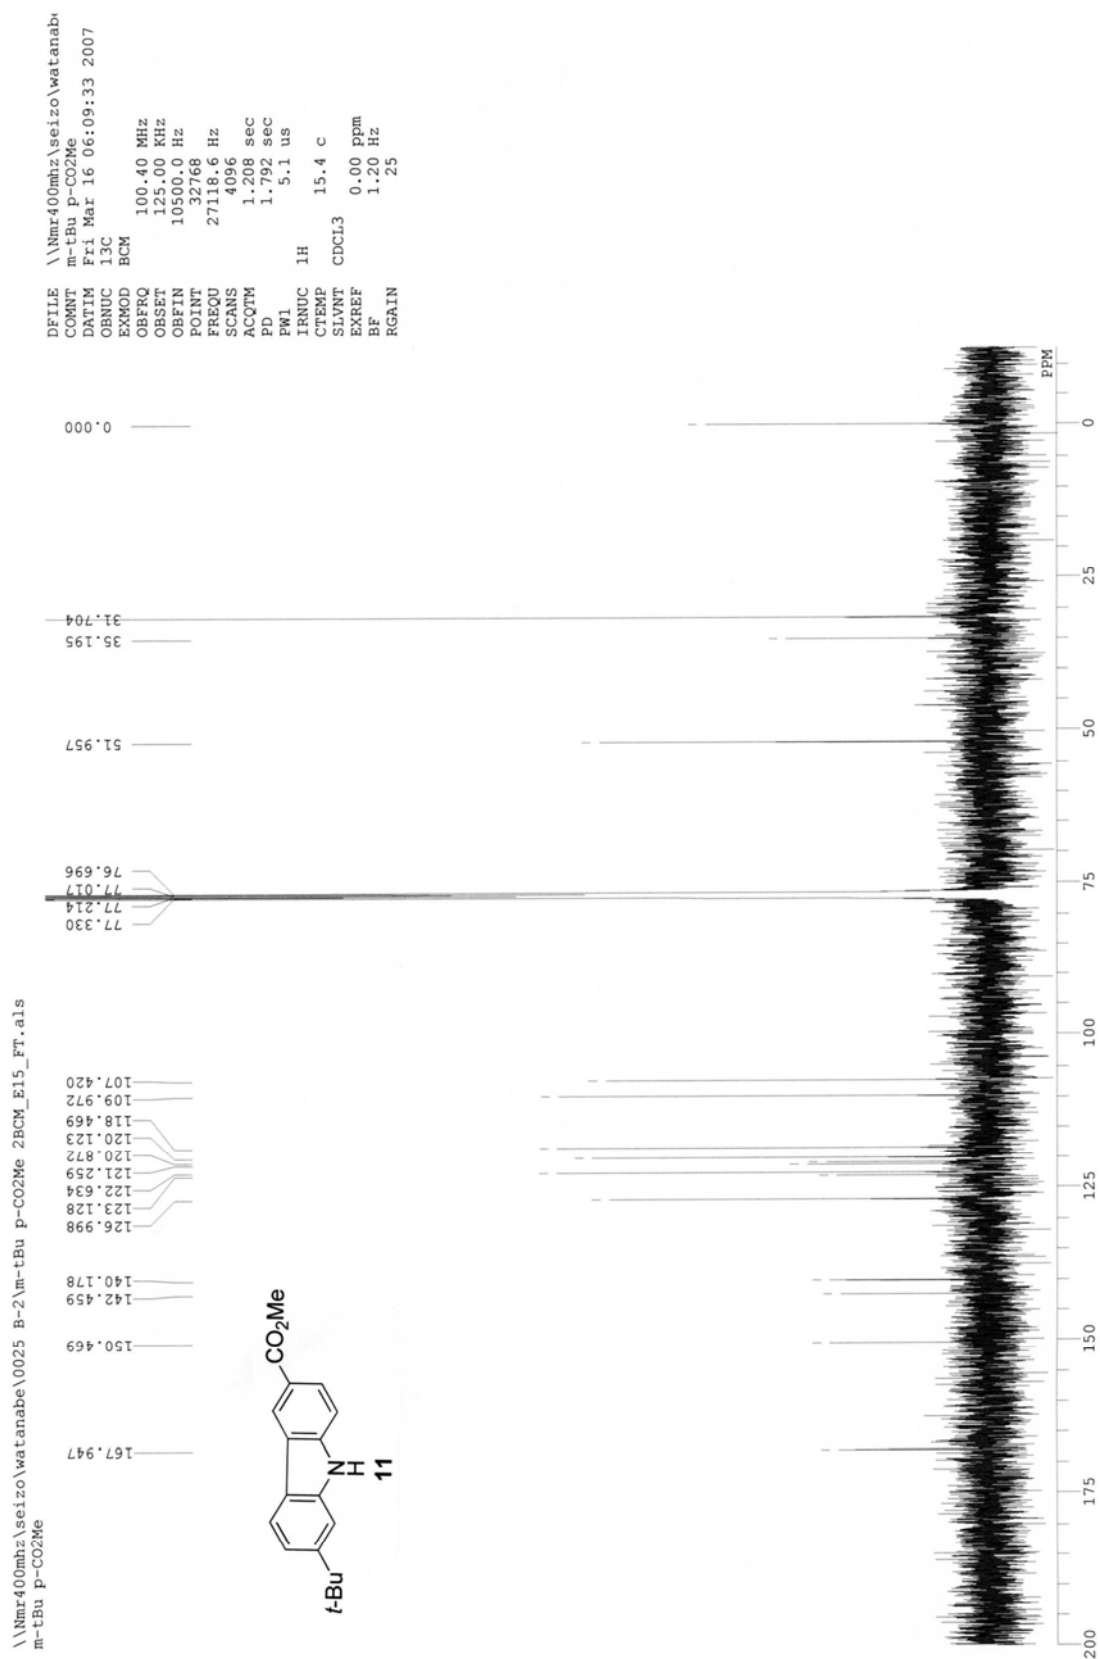



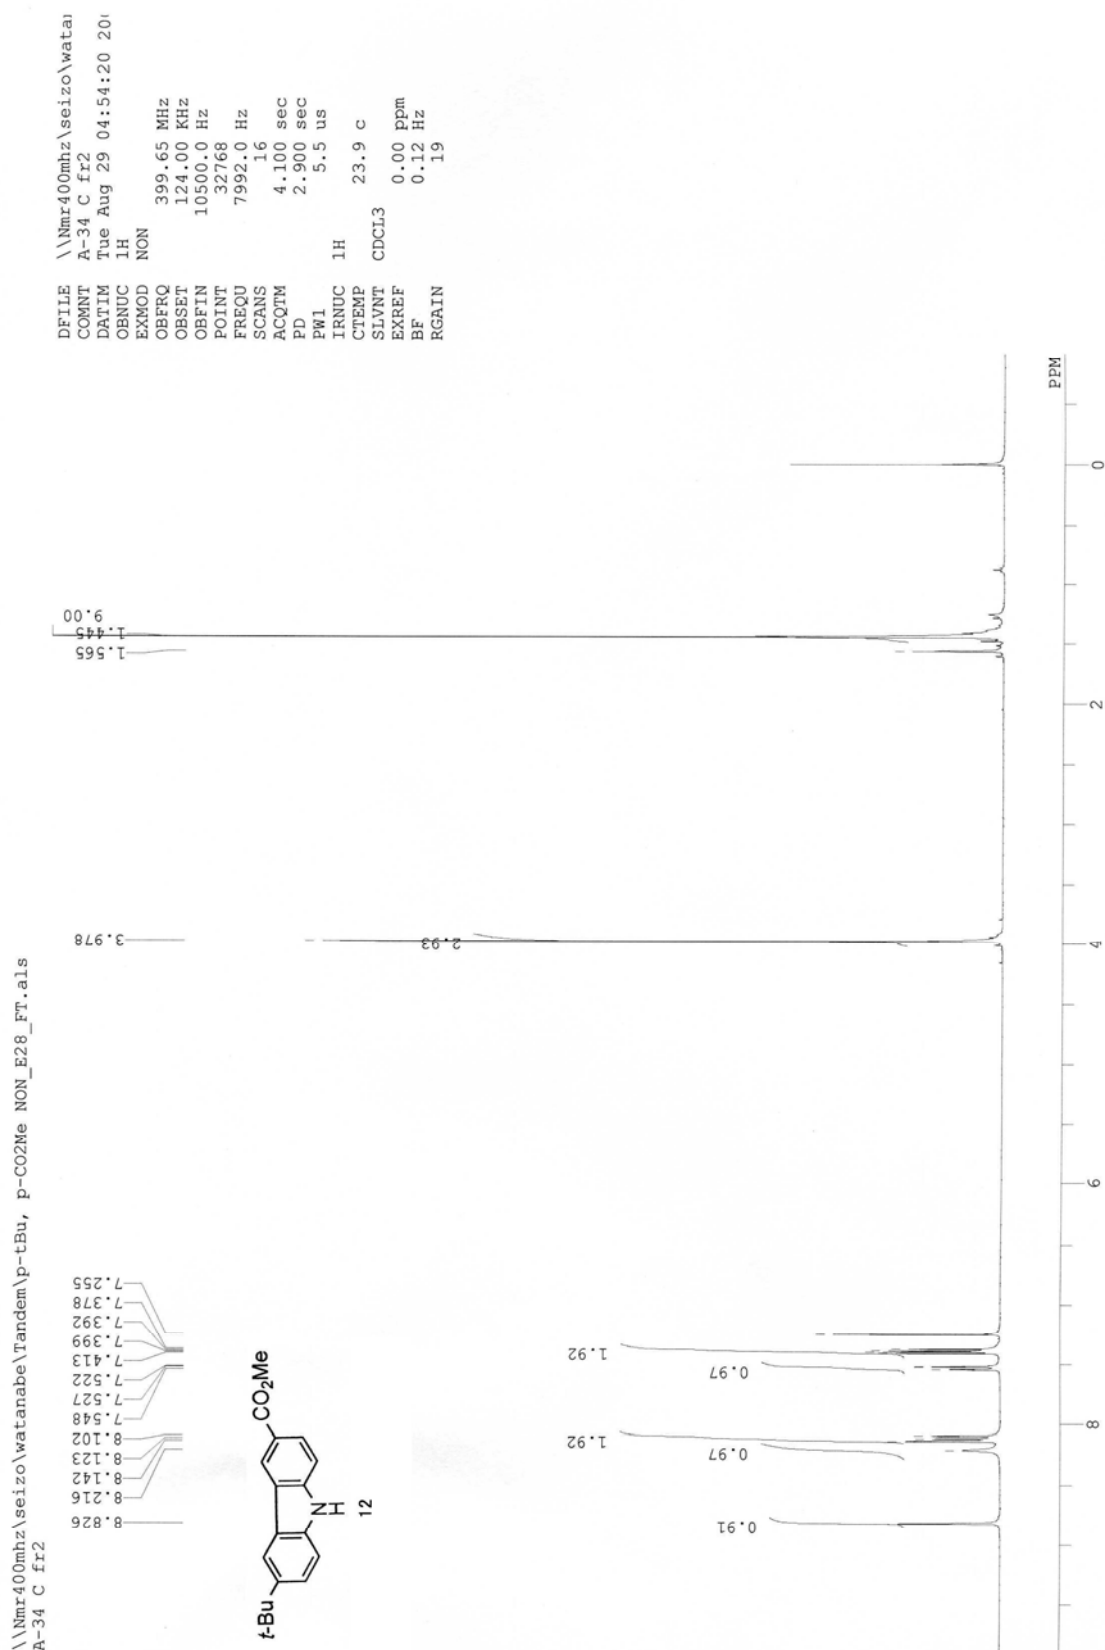

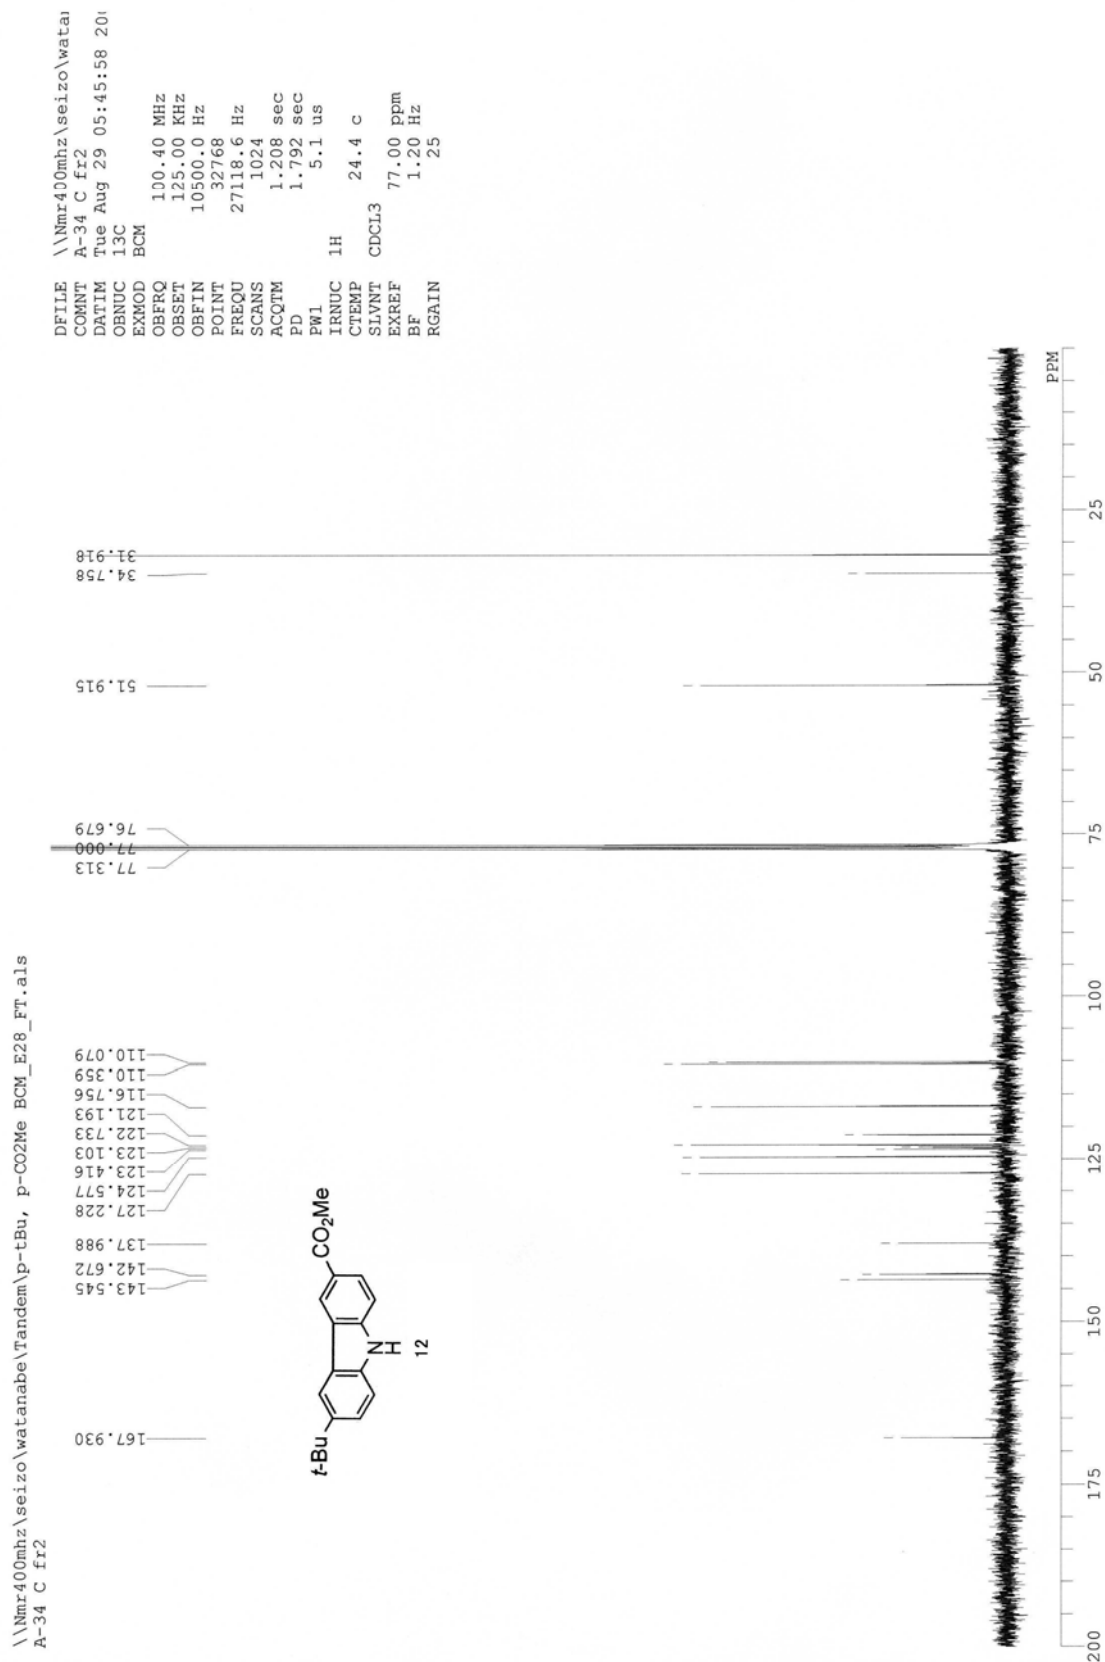

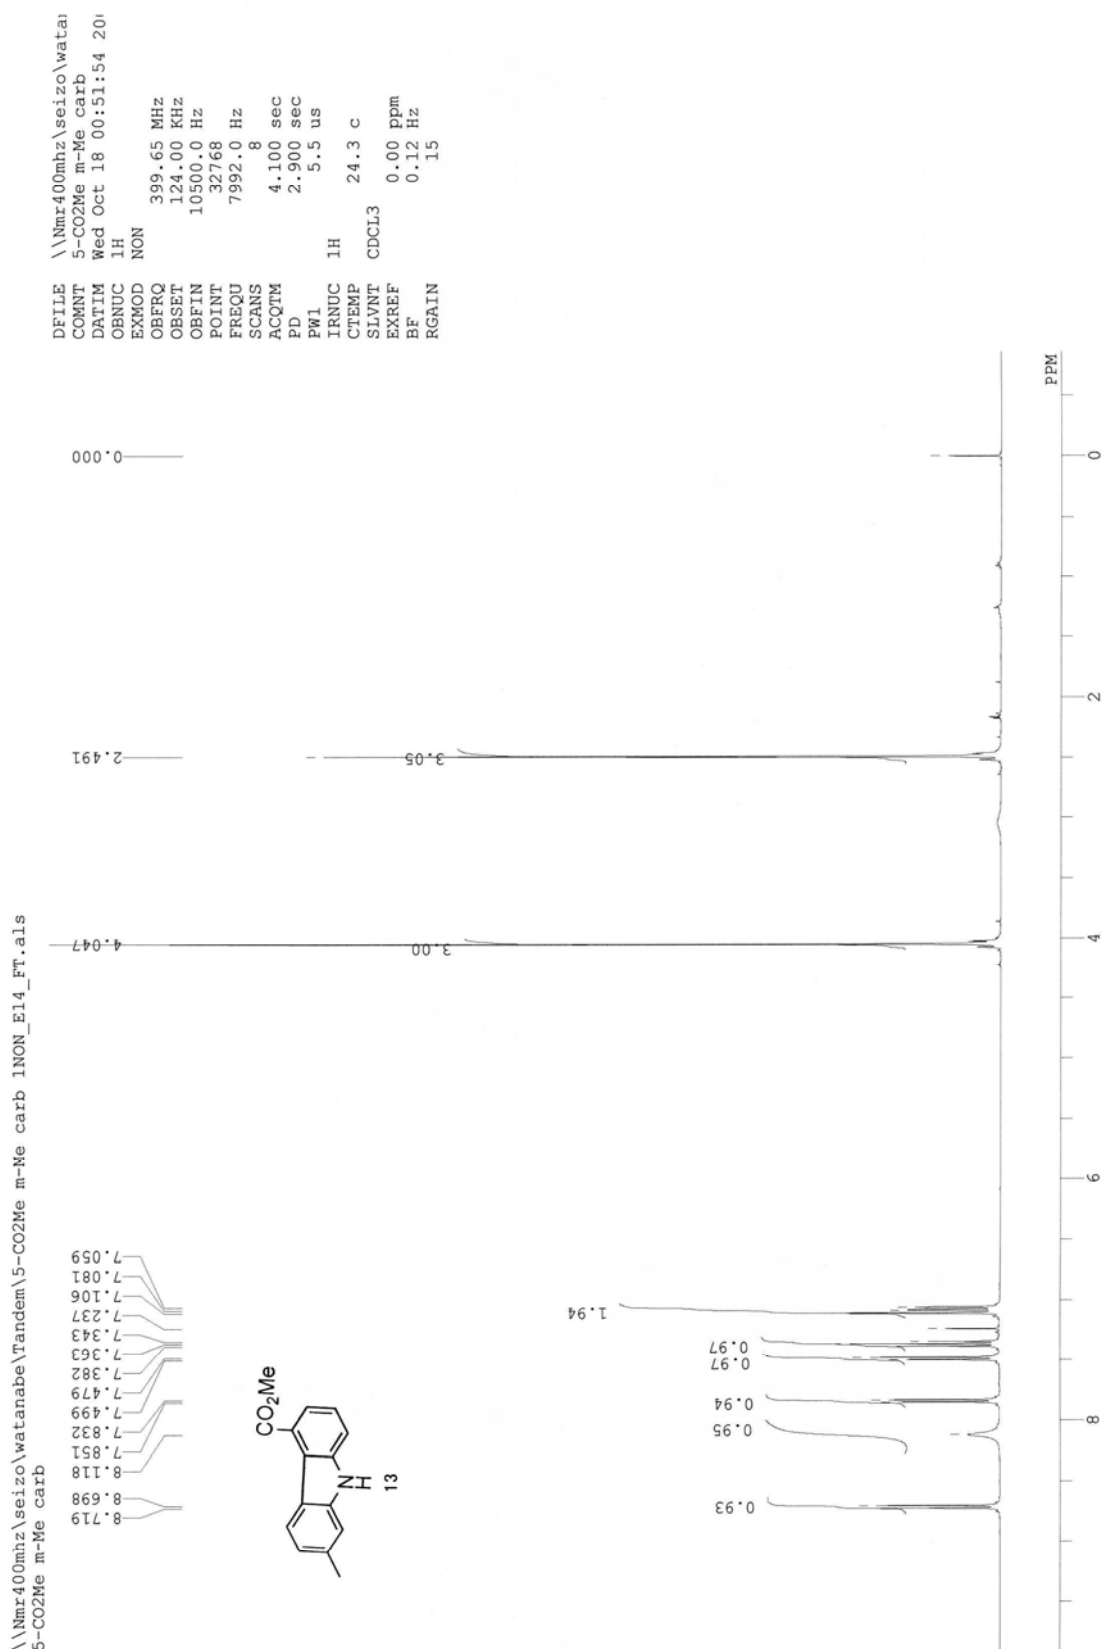

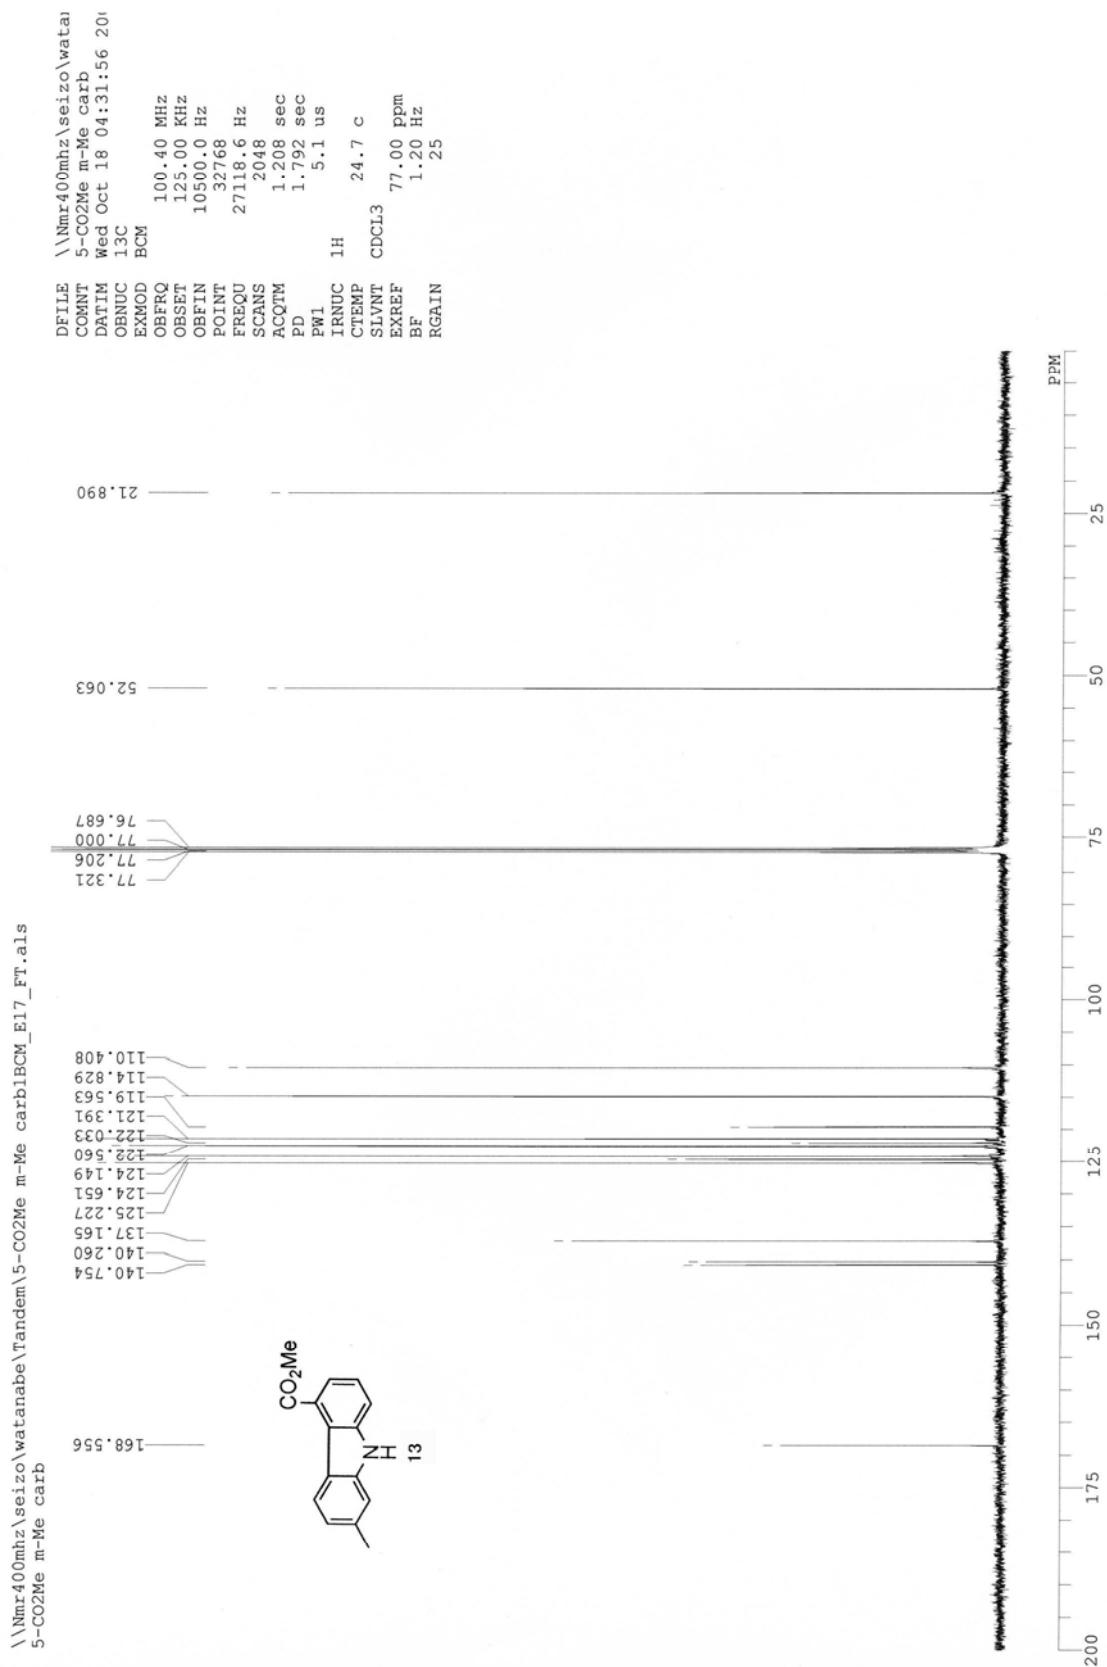

\\Nmr400mhz\seizo\watanabe\Tandem\3-CO2Me m-Me carb 1NON\_E15\_FT.als  
3-CO2Me m-Me carb

DFILE \\Nmr400mhz\seizo\watanabe\Tandem\3-CO2Me m-Me carb  
COMNT 3-CO2Me m-Me carb  
DATIM Wed Oct 18 00:57:27 2006  
OBNUC 1H  
EXMOD NON  
OBFRQ 399.65 MHz  
OBSET 124.00 KHz  
OBFIN 10500.0 Hz  
POINT 32768  
FREQU 7992.0 Hz  
SCANS 8  
AQTM 4.100 sec  
PD 2.900 sec  
PW1 5.5 us  
IRNUC 1H  
CTEMP 24.1 C  
SLVNT CDCL3  
EXREF 0.00 ppm  
BF 0.12 Hz  
RGAIN 23

0.000

2.538

3.965

8.133  
8.058  
8.038  
7.988  
7.968  
7.930  
7.909  
7.258  
7.106  
7.086

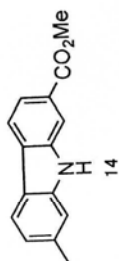

3.00

2.95

2.47

1.84  
1.03  
0.94

0.91

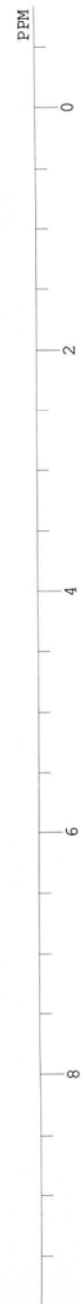

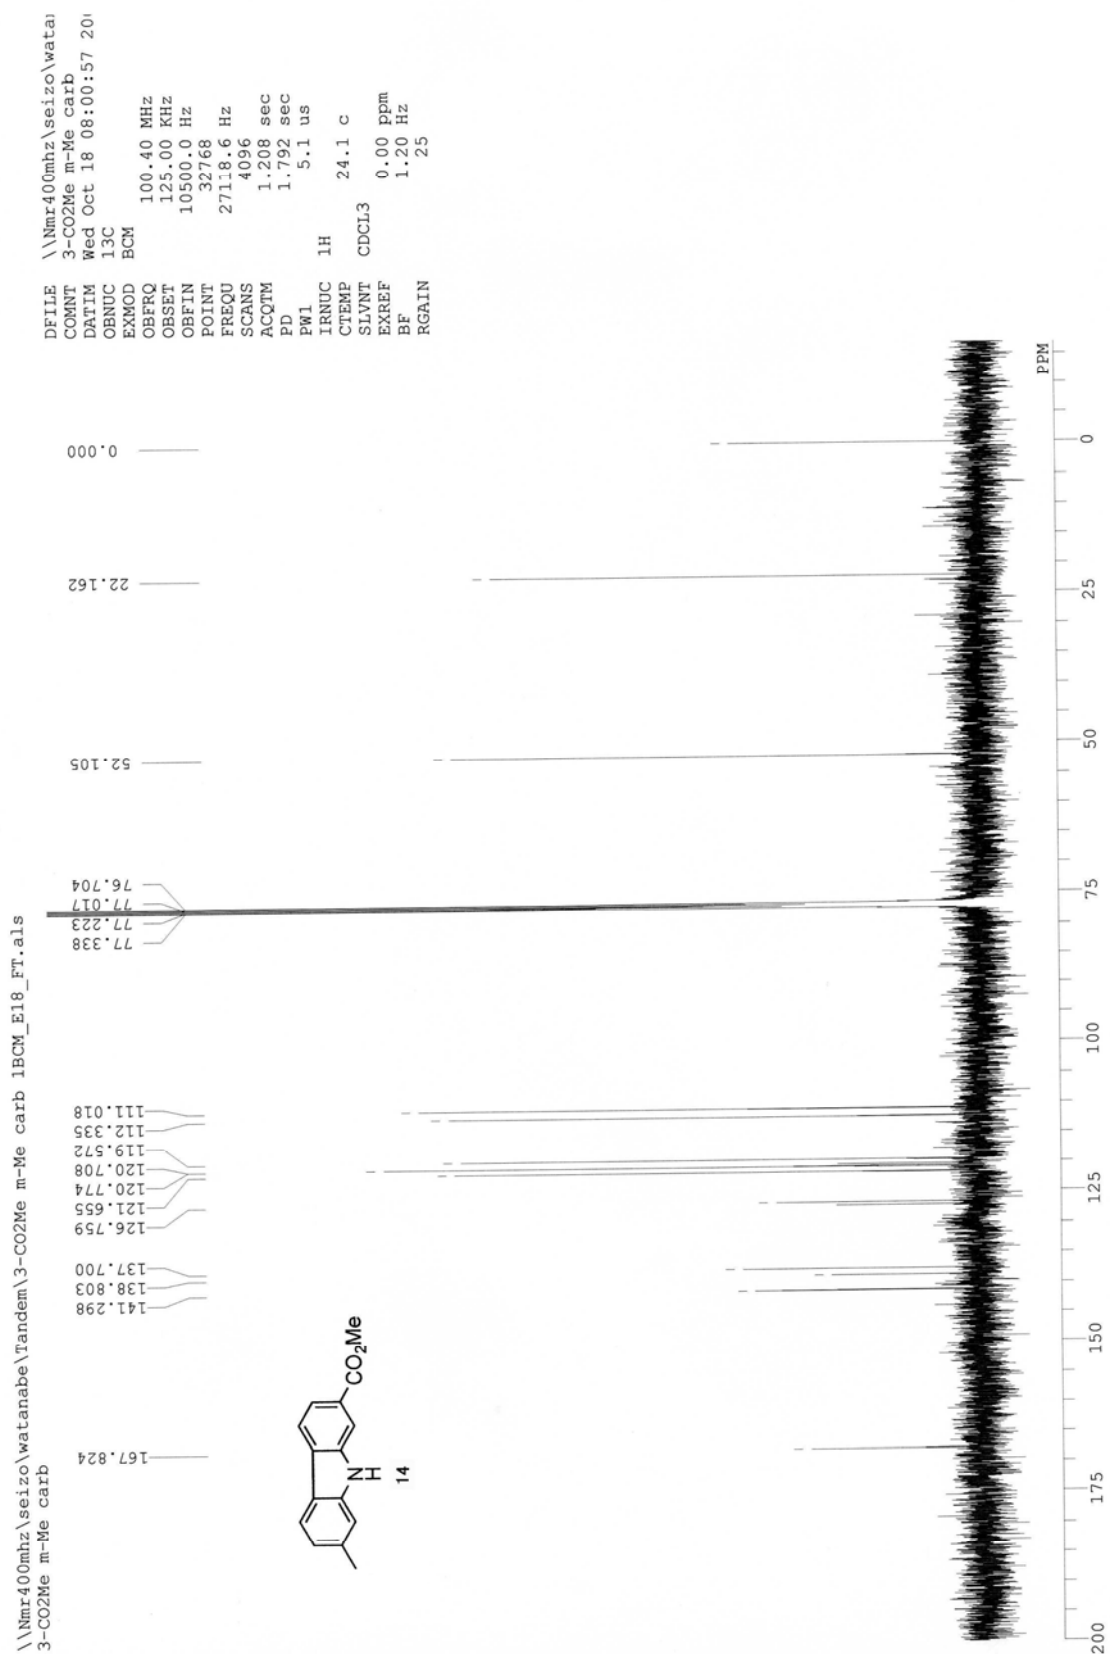

single pulse decoupled gated NOE

C:\Documents and Settings\seizou\デスクトップ\VP-naihyou-1.jdf

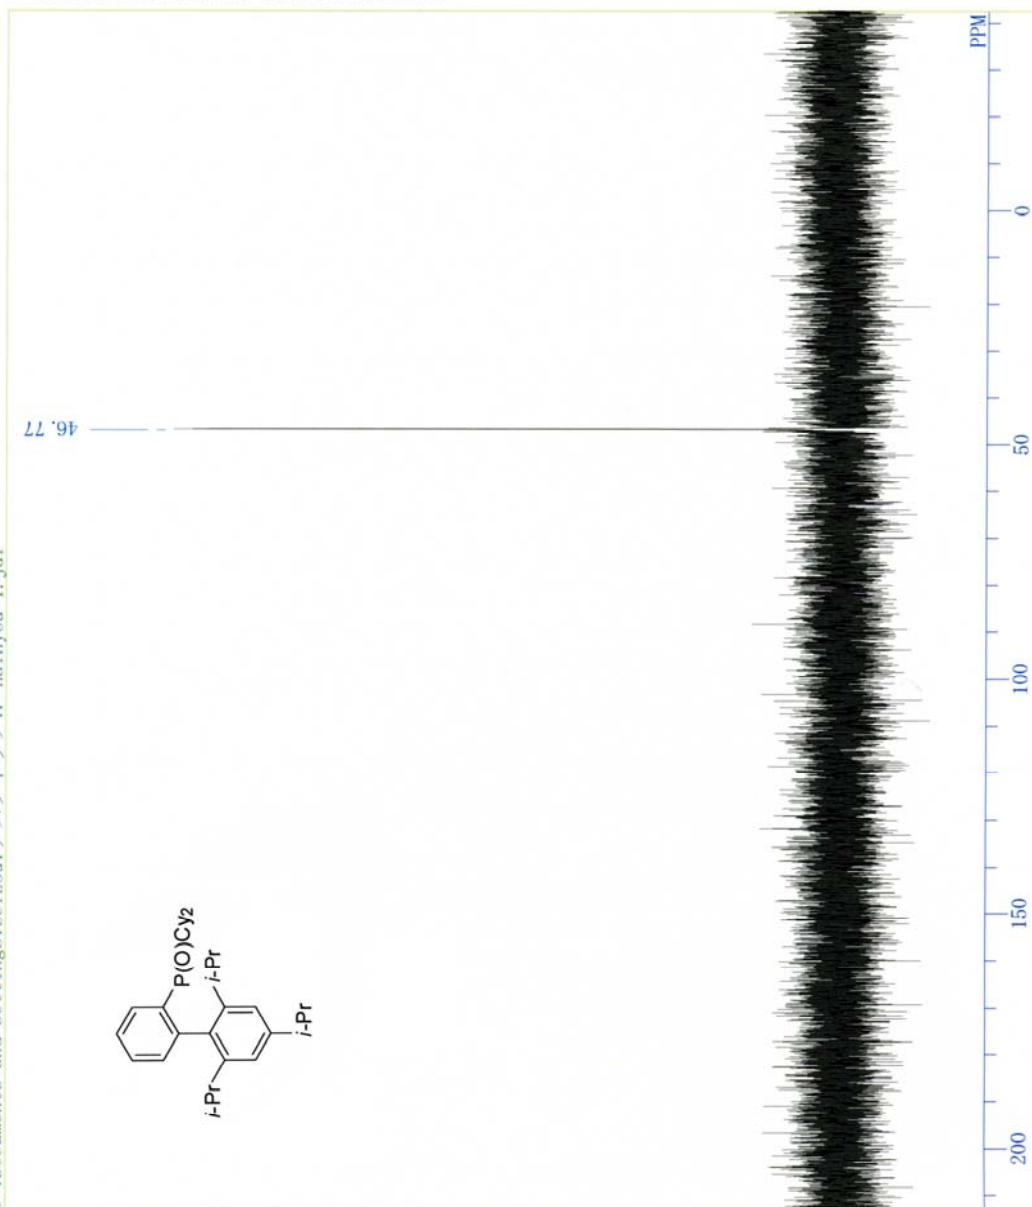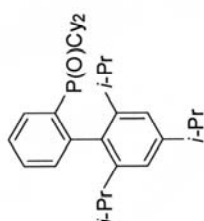

DFILE P-naihyou-1.jdf  
COMNT single pulse decoupled gate  
DATIM 14-07-2007 03:01:09  
OBNUC 31P  
EXMOD single\_pulse\_dec  
OBFREQ 202.46 MHz  
OBSET 8.31 KHz  
OBFIN 0.75 Hz  
POINT 131072  
FREQU 178571.41 Hz  
SCANS 20000  
ACQTM 0.7340 sec  
PD 2.0000 sec  
PW1 3.37 usec  
IRNUC 1H  
CTEMP 25.6 c  
SLVNT CDCL3  
EXREF 0.00 ppm  
BF 1.20 Hz  
RGAIN 50
